# Supplementary material for: Silver-catalyzed phosphonylation of unprotected propargylic alcohols for the synthesis of allenylphosphoryl compounds
Source: Royal Society of Chemistry journal article supplement (doi:10.1039/c6qo00767h), 2017-01-01

# Silver-catalyzed Phosponylation of Unprotected Propargylic Alcohols for Synthesis of Allenylphosphoryl Compounds

Liu-Liang Mao,<sup>a</sup> Yong-Hong Li,<sup>a</sup> Shang-Dong Yang<sup>a,b\*</sup>

<sup>a</sup> State Key Laboratory of Applied Organic Chemistry, Lanzhou University, Lanzhou 730000, P. R. China.

<sup>b</sup> State Key Laboratory for Oxo Synthesis and Selective Oxidation, Lanzhou Institute of Chemical Physics, Chinese Academy of Sciences, Lanzhou, 730000, P. R. China.

## Contents:

|                                                                       |   |
|-----------------------------------------------------------------------|---|
| 1. General information .....                                          | 1 |
| 2. Optimization reaction conditions .....                             | 1 |
| 3. The experimental procedure .....                                   | 3 |
| 4. Preliminary mechanistic studies .....                              | 3 |
| 5. Acid promoted transformations of allenes 3a into compounds 4a..... | 3 |
| 6. References .....                                                   | 4 |
| 7. Characterization data of products .....                            | 4 |
| 8. Copies of NMR spectra.....                                         | 9 |

## I . General Methods and Materials

All reactions involving air- and moisture-sensitive reagents were carried out under an argon atmosphere.  $^1\text{H}$  and  $^{13}\text{C}$  NMR spectra were recorded on a Bruker advance III 400 spectrometer (400 MHz for  $^1\text{H}$  and 100 MHz for  $^{13}\text{C}$ ) in  $\text{CDCl}_3$  with TMS as internal standard. Chemical shifts ( $\delta$ ) were measured in ppm relative to TMS  $\delta = 0$  for  $^1\text{H}$ , or to chloroform  $\delta = 77.0$  for  $^{13}\text{C}$  as internal standard.  $^{31}\text{P}$  and  $^{19}\text{F}$  NMR spectra were recorded on the same instrument. Data are reported as follows: Chemical shift, multiplicity (s = singlet, d = doublet, t = triplet, q = quartet, m = multiplet), Coupling constants,  $J$ , are reported in hertz. Mass data were measured with Thermo Scientific DSQ II mass spectrometer. The starting materials were purchased from Aldrich, Acros Organics, J&K Chemicals or TCI and used without further purification. Solvents were dried and purified according to the procedure from "Purification of Laboratory Chemicals book". Thin-layer chromatography (TLC) was performed using 60 mesh silica gel plates visualized with short-wavelength UV light (254 nm). Substrates were prepared according to literature methods.<sup>[S1]</sup>

## 2. Optimization reaction conditions

### 2-1. Optimization varying different catalysts of reaction conditions<sup>[a]</sup>

Table S1 The experiment react with different catalysts

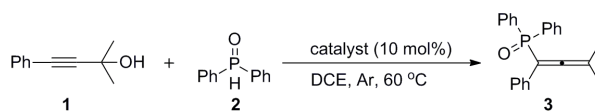

| entry | catalyst                                              | yield (%) <sup>[b]</sup> |
|-------|-------------------------------------------------------|--------------------------|
| 1     | AgOTf                                                 | 36%                      |
| 2     | Sc(OTf) <sub>3</sub>                                  | 21%                      |
| 3     | Cu(OTf) <sub>2</sub>                                  | 35%                      |
| 4     | LiOTf                                                 | 19%                      |
| 5     | Sm(OTf) <sub>3</sub>                                  | 36%                      |
| 6     | CuOTf                                                 | 13%                      |
| 7     | AgNTf <sub>2</sub>                                    | 25%                      |
| 8     | AgSbF <sub>6</sub>                                    | 28%                      |
| 9     | AgBF <sub>4</sub>                                     | trace                    |
| 10    | Ag <sub>2</sub> CO <sub>3</sub>                       | n. r.                    |
| 11    | Cu(ClO <sub>4</sub> ) <sub>2</sub>                    | 32%                      |
| 12    | FeCl <sub>3</sub>                                     | 30%                      |
| 13    | Fe(acac) <sub>2</sub>                                 | 22%                      |
| 14    | Co(ClO <sub>4</sub> ) <sub>2</sub> •6H <sub>2</sub> O | 21%                      |
| 15    | Ni(OAc) <sub>2</sub>                                  | 17%                      |

[a] The reaction was carried out with catalyst (10 mol %), **1a** (0.30 mmol), and **2a** (1.5 equiv.) in DCE (1.5 mL) at 60 °C under argon for 14 h, unless otherwise noted. [b] Yield of isolated product.

### 2-2. Optimization varying different additives of reaction conditions<sup>[a]</sup>

**Table S2** The experiment react with different additives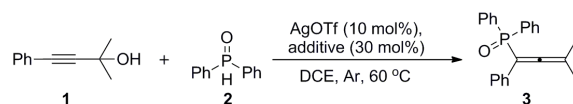

| entry             | additive                                                      | yield (%) <sup>[b]</sup> |
|-------------------|---------------------------------------------------------------|--------------------------|
| 1                 | Et <sub>3</sub> N                                             | n. r.                    |
| 2                 | K <sub>3</sub> PO <sub>4</sub>                                | n. r.                    |
| 3                 | K <sub>2</sub> CO <sub>3</sub>                                | n. r.                    |
| 4                 | Pyruvic acid                                                  | 35%                      |
| 5                 | Trifluoroacetic anhydride                                     | 38%                      |
| 6                 | CF <sub>3</sub> SO <sub>3</sub> H                             | 30%                      |
| 7                 | TsOH•H <sub>2</sub> O                                         | 25%                      |
| 8                 | Pivalic acid                                                  | 28%                      |
| 9 <sup>[c]</sup>  | (NH <sub>4</sub> ) <sub>2</sub> S <sub>2</sub> O <sub>8</sub> | 25%                      |
| 10 <sup>[c]</sup> | PhI(OAc) <sub>2</sub>                                         | n. r.                    |

[a] The reaction was carried out with AgOTf (10 mol %), **1a** (0.30 mmol), and **2a** (1.5 equiv.), additive (30 mol %) in DCE (1.5 mL) at 60 °C under argon for 14 h, unless otherwise noted. [b] Yield of isolated product. [c] additive (100 mol %)

### 2-3. Optimization varying different solvents of reaction conditions<sup>[a]</sup>

**Table S3** The experiment react with different solvents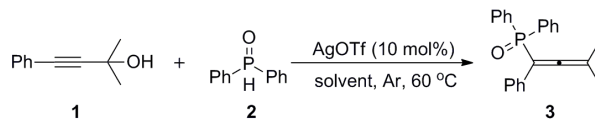

| entry | solvent                            | yield (%) <sup>[b]</sup> |
|-------|------------------------------------|--------------------------|
| 1     | DCE                                | 36%                      |
| 2     | MeCN                               | 36%                      |
| 3     | THF                                | trace                    |
| 4     | dioxane                            | Trace                    |
| 5     | toluene                            | trace                    |
| 6     | DMF                                | n. r.                    |
| 7     | CF <sub>3</sub> CH <sub>2</sub> OH | <b>1</b> decomposition   |
| 8     | DMSO                               | n. r.                    |
| 9     | CH <sub>3</sub> NO <sub>2</sub>    | 47%                      |
| 10    | DCM                                | 30%                      |

[a] The reaction was carried out with AgOTf (10 mol %), **1a** (0.30 mmol), and **2a** (1.5 equiv.) in solvent (1.5 mL) at 60 °C under argon for 14 h, unless otherwise noted. [b] Yield of isolated product.

### 2-4. Optimization varying different temperatures / substrate ratio of reaction conditions<sup>[a]</sup>

**Table S4** The experiment react with different reaction conditions

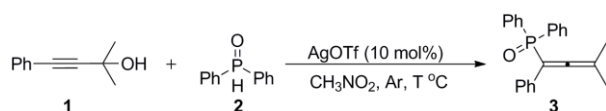

| entry    | 1/2          | T (°C)    | yield (%) <sup>[b]</sup> |
|----------|--------------|-----------|--------------------------|
| 1        | 1/1          | 60        | 46%                      |
| 2        | 1/2          | 60        | 48%                      |
| 3        | 3/2          | 60        | 60%                      |
| 4        | 2/1          | 60        | 75%                      |
| <b>5</b> | <b>2.5/1</b> | <b>60</b> | <b>87%</b>               |
| 6        | 3/1          | 60        | 87%                      |
| 7        | 3/2          | 40        | 35%                      |
| 8        | 3/2          | 80        | 43%                      |
| 9        | 3/2          | 100       | 15%                      |

[a] The reaction was carried out with AgOTf (10 mol %), **1a**, and **2a** in CH<sub>3</sub>NO<sub>2</sub> (1.5 mL) at T °C under argon for 14 h, unless otherwise noted. [b] Yield of isolated product.

### 3. General Procedure for the Synthesis of 3a-3z.

To a Schlenk tube were added propargylic alcohol **1** (0.75 mmol), AgOTf (10 mmol%), P(O)H **2** (0.3 mmol) and charged with argon for three times. CH<sub>3</sub>NO<sub>2</sub> (1.5 mL) was added and the mixture was stirred at 60 °C under Ar for 14 h. The substrate was consumed (monitored by TLC), After substrate was consumed, the reaction was cooled to room temperature and concentrated in vacuo, and the resulting residue was purified by column chromatography using a mixture of petroleum ether / ethyl acetate and petroleum ether / Isopropanol as eluent to give **3**.

### 4. Preliminary mechanistic studies.

#### 4.1 Radicals Trapping Experiments using BHT

In a Schlenk tube, 2-methyl-4-phenylbut-3-yn-2-ol **1a** (0.75 mmol), AgOTf (10 mol %), HP(O)Ph<sub>2</sub> (0.30 mmol) and BHT (2.5 equiv) were added and charged with Ar three times. Then, CH<sub>3</sub>NO<sub>2</sub> (1.5 mL) were added. The mixture was allowed to stir at 60 °C for 14 hours (monitored by TLC). After substrate was consumed, the reaction was cooled to room temperature and concentrated in vacuo. The resulting residue was purified by column chromatography to give **3a** in 84% yield (Scheme S1). Thus this preliminary studies demonstrate that a radical pathway isn't involved in the reaction.

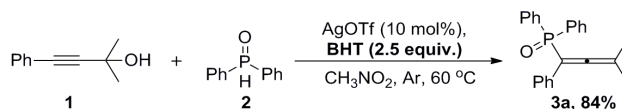

Scheme S1 Radicals Trapping Experiments using BHT

### 5. Acid promoted transformations of allenes **3a** into compounds **4a**.

A solution of allenes **3a** (0.3 mmol) in TfOH (1 mL) was stirred at 25 °C for 8 h. The mixture was poured into ice water (30 mL) and extracted with DCM (3 × 30 mL). The extracts were combined, washed with water, a saturated aqueous solution of NaHCO<sub>3</sub>, and water again, and dried over

Na<sub>2</sub>SO<sub>4</sub>, and then the solvent was distilled off under reduced pressure, the resulting residue was purified by column chromatography to give **4a** in 67% yield (72 mg).

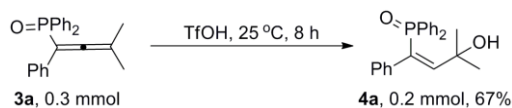

**Scheme S2** Acid promoted transformations of allenes **3a** into compounds **4a**

**(Z)-(3-hydroxy-3-methyl-1-phenylbut-1-en-1-yl)diphenylphosphine oxide (4a)**

white solid, <sup>1</sup>H NMR (400 MHz, CDCl<sub>3</sub>) δ 7.66 – 7.53 (m, 4H), 7.48 (td, *J* = 7.4, 1.2 Hz, 2H), 7.36 (td, *J* = 7.6, 3.0 Hz, 4H), 7.17 – 7.05 (m, 2H), 7.01 (t, *J* = 7.6 Hz, 2H), 6.83 – 6.58 (m, 3H), 1.56 (s, 6H). <sup>13</sup>C NMR (101 MHz, CDCl<sub>3</sub>) δ 161.8 (d, *J* = 6.0 Hz), 139.7 (d, *J* = 12.6 Hz), 132.4, 132.3, 132.1, 131.8 (d, *J* = 2.7 Hz), 131.5, 131.2, 130.4, 129.6, 129.5, 128.1, 127.9, 127.7, 127.02 (d, *J* = 1.6 Hz), 70.3 (d, *J* = 5.0 Hz), 30.8. <sup>31</sup>P NMR (162 MHz, CDCl<sub>3</sub>) δ 32.27. MS (ESI): found [M+H]<sup>+</sup> 362.8.

## 6. References

[S1] (a) Cao, C.; Li, Y.; Shi, Y.; Odom, A. L. *Chem. Commun.* **2004**, 2002. (b) Hashmi, A. S. K.; Wang, T.; Shi, S.; Rudolph, M. *J. Org. Chem.* **2012**, *77*, 7761. (c) Paegle, E.; Belyakov, S.; Petrova, M.; Liepinsh, E.; Arsenyan, P. *Eur. J. Org. Chem.* **2015**, 4389. (d) Csékei, M.; Novák, Z.; Kotschy, A. *Tetrahedron*, **2007**, *64*, 975.

## 7. Characterization data of products

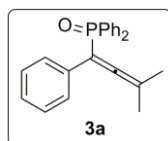

**(3-methyl-1-phenylbuta-1,2-dien-1-yl)diphenylphosphine oxide (3a) (87%)** White solid; <sup>1</sup>H NMR (400 MHz, CDCl<sub>3</sub>) δ 7.73 (m, 4H), 7.57 (t, *J* = 10.5 Hz, 2H), 7.53 – 7.45 (m, 2H), 7.45 – 7.37 (m, 4H), 7.27 – 7.19 (m, 2H), 7.15 (t, *J* = 7.3 Hz, 1H), 1.46 (d, *J* = 6.0 Hz, 6H). <sup>13</sup>C NMR (101 MHz, CDCl<sub>3</sub>) δ 210.0 (d, *J* = 6.2 Hz), 133.5, 133.4, 133.3, 132.4, 131.6, 131.5, 131.4, 128.4, 128.2, 128.1, 128.0, 127.2, 99.9 (d, *J* = 13.6 Hz), 99.1 (d, *J* = 103.3 Hz), 18.93 (d, *J* = 5.7 Hz). <sup>31</sup>P NMR (162 MHz, CDCl<sub>3</sub>) δ 31.53. MS (ESI): found [M+H]<sup>+</sup> 344.8.

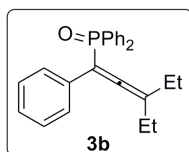

**(3-ethyl-1-phenylpenta-1,2-dien-1-yl)diphenylphosphine oxide (3b) (30%)** White solid; <sup>1</sup>H NMR (400 MHz, CDCl<sub>3</sub>) δ 7.82 – 7.69 (m, 4H), 7.64 (d, *J* = 7.9 Hz, 2H), 7.53 – 7.45 (m, 2H), 7.45 – 7.36 (m, 4H), 7.30 – 7.20 (m, 2H), 7.16 (dd, *J* = 8.4, 6.2 Hz, 1H), 1.95 – 1.79 (m, 2H), 1.80 – 1.63 (m, 2H), 0.87 (t, *J* = 7.4 Hz, 6H). <sup>13</sup>C NMR (101 MHz, CDCl<sub>3</sub>) δ 208.7 (d, *J* = 7.0 Hz), 133.7 (d, *J* = 8.2 Hz), 133.5, 132.5, 131.7, 131.6, 131.5, 131.4, 128.5, 128.2, 128.1, 127.8, 127.7, 127.1, 112.3 (d, *J* = 13.4 Hz), 102.5 (d, *J* = 104.3 Hz), 25.1 (d, *J* = 5.2 Hz), 12.0 (d, *J* = 1.9 Hz). <sup>31</sup>P NMR (162 MHz, CDCl<sub>3</sub>) δ 31.30. MS (ESI): found [M+H]<sup>+</sup> 372.9.

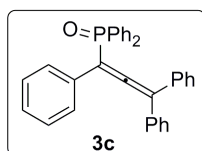

**diphenyl(1,3,3-triphenylpropa-1,2-dien-1-yl)phosphine oxide (3c) (35%)** White solid;  $^1\text{H}$  NMR (400 MHz,  $\text{CDCl}_3$ )  $\delta$  7.70 (m, 6H), 7.40 (m, 2H), 7.34 – 7.23 (m, 12H), 7.20 (t,  $J = 7.3$  Hz, 1H), 7.03 (dd,  $J = 6.5, 2.8$  Hz, 4H).  $^{13}\text{C}$  NMR (101 MHz,  $\text{CDCl}_3$ )  $\delta$  212.48 (d,  $J = 5.3$  Hz), 134.43 (d,  $J = 6.1$  Hz), 132.80, 132.02 (d,  $J = 6.6$  Hz), 131.76 (d,  $J = 3.0$  Hz), 131.54 (d,  $J = 9.8$  Hz), 128.74, 128.43, 128.26 (d,  $J = 7.2$  Hz), 128.16 (d,  $J = 1.5$  Hz), 128.13, 128.03, 127.91, 113.76 (d,  $J = 13.6$  Hz), 104.10 (d,  $J = 99.2$  Hz).  $^{31}\text{P}$  NMR (162 MHz,  $\text{CDCl}_3$ )  $\delta$  29.59. MS (ESI): found  $[\text{M}+\text{H}]^+$  469.0.

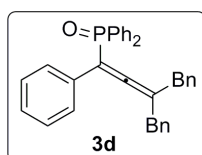

**(3-benzyl-1,4-diphenylbuta-1,2-dien-1-yl)diphenylphosphine oxide (3d) (70%)** White solid;  $^1\text{H}$  NMR (400 MHz,  $\text{CDCl}_3$ )  $\delta$  7.45 (m, 8H), 7.35 (m, 4H), 7.27 – 7.17 (m, 8H), 7.17 – 7.09 (m, 1H), 6.91 (m, 4H), 3.26 – 2.91 (m, 4H).  $^{13}\text{C}$  NMR (101 MHz,  $\text{CDCl}_3$ )  $\delta$  209.8 (d,  $J = 7.2$  Hz), 137.5 (d,  $J = 2.1$  Hz), 132.8 (d,  $J = 6.7$  Hz), 131.7, 131.6, 131.5 (d,  $J = 2.7$  Hz), 129.1, 128.3, 128.2, 128.1, 128.0, 127.9 (d,  $J = 4.8$  Hz), 127.2, 126.5, 108.6 (d,  $J = 13.5$  Hz), 102.0 (d,  $J = 103.0$  Hz), 38.4 (d,  $J = 5.0$  Hz).  $^{31}\text{P}$  NMR (162 MHz,  $\text{CDCl}_3$ )  $\delta$  30.47. MS (ESI): found  $[\text{M}+\text{H}]^+$  497.2.

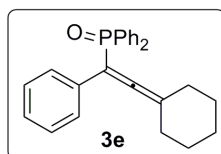

**(2-cyclohexylidene-1-phenylvinyl)diphenylphosphine oxide (3e) (68%)** white solid;  $^1\text{H}$  NMR (400 MHz,  $\text{CDCl}_3$ )  $\delta$  7.83 – 7.68 (m, 4H), 7.58 (d,  $J = 8.1$  Hz, 2H), 7.53 – 7.46 (m, 2H), 7.42 (m, 4H), 7.24 (dd,  $J = 14.8, 7.5$  Hz, 2H), 7.15 (t,  $J = 7.3$  Hz, 1H), 2.06 (m, 2H), 1.95 – 1.78 (m, 2H), 1.46 (m, 2H), 1.32 (dd,  $J = 10.9, 4.7$  Hz, 2H), 1.03 (m, 2H).  $^{13}\text{C}$  NMR (101 MHz,  $\text{CDCl}_3$ )  $\delta$  206.5 (d,  $J = 7.0$  Hz), 133.6 (d,  $J = 8.1$  Hz), 133.5, 132.5, 131.7, 131.6, 131.5 (d,  $J = 2.8$  Hz), 128.4, 128.3, 128.2, 128.0 (d,  $J = 4.9$  Hz), 127.0, 105.9 (d,  $J = 13.3$  Hz), 98.9 (d,  $J = 104.8$  Hz), 29.7 (d,  $J = 5.3$  Hz), 26.2 (d,  $J = 3.0$  Hz), 25.2.  $^{31}\text{P}$  NMR (162 MHz,  $\text{CDCl}_3$ )  $\delta$  31.30. MS (ESI): found  $[\text{M}+\text{H}]^+$  385.0.

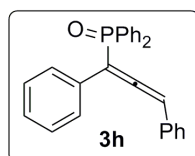

**(1,3-diphenylpropa-1,2-dien-1-yl)diphenylphosphine oxide (3g) (88%)** white solid;  $^1\text{H}$  NMR (400 MHz,  $\text{CDCl}_3$ )  $\delta$  7.84 – 7.71 (m, 4H), 7.68 (d,  $J = 7.9$  Hz, 2H), 7.49 – 7.41 (m, 1H), 7.41 – 7.33 (m, 3H), 7.33 – 7.17 (m, 8H), 7.11 (d,  $J = 7.9$  Hz, 2H), 6.29 (d,  $J = 10.7$  Hz, 1H).  $^{13}\text{C}$  NMR (101 MHz,  $\text{CDCl}_3$ )  $\delta$  212.9 (d,  $J = 5.7$  Hz), 132.6 (d,  $J = 38.3$  Hz), 131.8 (d,  $J = 2.9$  Hz), 131.7 (d,  $J = 2.6$  Hz), 131.6, 131.6 (d,  $J = 1.7$  Hz), 131.5, 131.4, 131.3, 128.7, 128.6, 128.4, 128.3, 128.2, 128.1, 128.0, 127.9, 127.8, 126.8 (d,  $J = 2.1$  Hz), 105.4 (d,  $J = 98.8$  Hz), 98.4 (d,  $J = 13.1$  Hz).  $^{31}\text{P}$  NMR (162 MHz,  $\text{CDCl}_3$ )  $\delta$  29.72. MS (ESI): found  $[\text{M}+\text{H}]^+$  392.8.

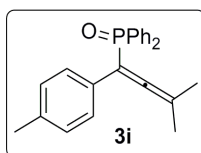

**(3-methyl-1-(p-tolyl)buta-1,2-dien-1-yl)diphenylphosphine oxide (3i) (88%)** white solid;  $^1\text{H NMR}$  (400 MHz,  $\text{CDCl}_3$ )  $\delta$  7.87 – 7.64 (m, 4H), 7.54 – 7.44 (m, 4H), 7.40 (m, 4H), 7.04 (d,  $J = 8.0$  Hz, 2H), 2.25 (s, 3H), 1.45 (d,  $J = 6.1$  Hz, 6H).  $^{13}\text{C NMR}$  (101 MHz,  $\text{CDCl}_3$ )  $\delta$  209.6 (d,  $J = 6.2$  Hz), 136.8, 132.9 (d,  $J = 105.6$  Hz), 131.5, 131.4, 130.2 (d,  $J = 8.0$  Hz), 129.1, 128.1, 128.0, 127.9, 99.6 (d,  $J = 13.7$  Hz), 98.7 (d,  $J = 103.4$  Hz), 20.9, 18.9 (d,  $J = 5.8$  Hz).  $^{31}\text{P NMR}$  (162 MHz,  $\text{CDCl}_3$ )  $\delta$  31.65. **MS (ESI):** found  $[\text{M}+\text{H}]^+$  358.9.

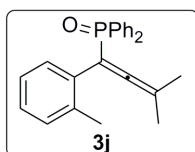

**(3-methyl-1-(o-tolyl)buta-1,2-dien-1-yl)diphenylphosphine oxide (3j) (86%)** white solid;  $^1\text{H NMR}$  (400 MHz,  $\text{CDCl}_3$ )  $\delta$  7.75 (m, 4H), 7.62 – 7.35 (m, 7H), 7.22 – 6.95 (m, 3H), 2.35 (s, 3H), 1.47 (d,  $J = 6.2$  Hz, 6H).  $^{13}\text{C NMR}$  (101 MHz,  $\text{CDCl}_3$ )  $\delta$  209.8 (d,  $J = 6.2$  Hz), 136.5 (d,  $J = 5.6$  Hz), 133.2, 132.2 (d,  $J = 7.0$  Hz), 132.1, 131.5, 131.4, 131.3 (d,  $J = 2.7$  Hz), 130.4, 129.4 (d,  $J = 3.0$  Hz), 128.0, 127.9, 127.3, 125.6, 97.3 (d,  $J = 14.0$  Hz), 97.2 (d,  $J = 101.2$  Hz), 20.7, 18.7 (d,  $J = 5.8$  Hz).  $^{31}\text{P NMR}$  (162 MHz,  $\text{CDCl}_3$ )  $\delta$  30.39. **MS (ESI):** found  $[\text{M}+\text{H}]^+$  358.7.

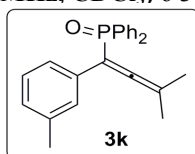

**(3-methyl-1-(m-tolyl)buta-1,2-dien-1-yl)diphenylphosphine oxide (3k) (78%)** white solid;  $^1\text{H NMR}$  (400 MHz,  $\text{CDCl}_3$ )  $\delta$  7.85 – 7.63 (m, 4H), 7.58 – 7.32 (m, 8H), 7.13 (m, 1H), 6.97 (d,  $J = 7.5$  Hz, 1H), 2.26 (s, 3H), 1.45 (d,  $J = 6.1$  Hz, 6H).  $^{13}\text{C NMR}$  (101 MHz,  $\text{CDCl}_3$ )  $\delta$  210.0 (d,  $J = 6.2$  Hz), 138.0, 133.5, 133.2 (d,  $J = 8.0$  Hz), 132.5, 131.5, 131.4 (d,  $J = 4.6$  Hz), 128.7 (d,  $J = 5.0$  Hz), 128.3, 128.1, 128.0, 125.3 (d,  $J = 4.8$  Hz), 99.7 (d,  $J = 13.6$  Hz), 99.0 (d,  $J = 103.1$  Hz), 21.4, 18.9 (d,  $J = 5.8$  Hz).  $^{31}\text{P NMR}$  (162 MHz,  $\text{CDCl}_3$ )  $\delta$  31.56. **MS (ESI):** found  $[\text{M}+\text{H}]^+$  359.0.

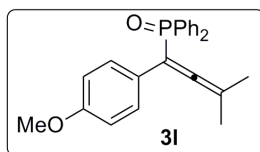

**(1-(4-methoxyphenyl)-3-methylbuta-1,2-dien-1-yl)diphenylphosphine oxide (3l) (65%)** white solid;  $^1\text{H NMR}$  (400 MHz,  $\text{CDCl}_3$ )  $\delta$  7.82 – 7.66 (m, 4H), 7.52 (d,  $J = 8.7$  Hz, 2H), 7.49 – 7.45 (m, 2H), 7.45 – 7.39 (m, 4H), 6.82 – 6.72 (m, 2H), 3.72 (s, 3H), 1.45 (d,  $J = 6.1$  Hz, 6H).  $^{13}\text{C NMR}$  (101 MHz,  $\text{CDCl}_3$ )  $\delta$  209.3 (d,  $J = 6.3$  Hz), 133.4, 132.3 (d,  $J = 6.8$  Hz), 131.5, 131.4 (d,  $J = 3.7$  Hz), 130.6, 129.3 (d,  $J = 5.0$  Hz), 128.4 (d,  $J = 11.0$  Hz), 128.2, 128.0, 125.4 (d,  $J = 8.2$  Hz), 113.9, 113.6, 99.8 (d,  $J = 13.8$  Hz), 98.4 (d,  $J = 103.6$  Hz), 55.1, 19.0 (d,  $J = 5.8$  Hz).  $^{31}\text{P NMR}$  (162 MHz,  $\text{CDCl}_3$ )  $\delta$  31.93. **MS (ESI):** found  $[\text{M}+\text{H}]^+$  375.0.

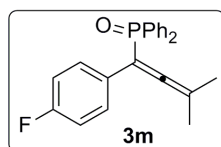

**(1-(4-fluorophenyl)-3-methylbuta-1,2-dien-1-yl)diphenylphosphine oxide (3m) (80%)** white solid;  $^1\text{H NMR}$  (400 MHz,  $\text{CDCl}_3$ )  $\delta$  7.73 (dd,  $J = 11.9, 7.7$  Hz, 4H), 7.58 (dd,  $J = 8.5, 5.5$  Hz, 2H), 7.53 – 7.46 (m, 2H), 7.43 (t,  $J = 7.2$  Hz, 4H), 6.92 (t,  $J = 8.4$  Hz, 2H), 1.46 (d,  $J = 5.9$  Hz, 6H).  $^{13}\text{C NMR}$  (101 MHz,  $\text{CDCl}_3$ )  $\delta$  209.6 (d,  $J = 6.0$  Hz), 163.1, 160.6, 133.1, 132.0, 131.5 (d,  $J = 2.8$  Hz), 131.5, 131.4, 129.8 (d,  $J = 4.9$  Hz), 129.7 (d,  $J = 4.9$  Hz), 129.3, 129.2, 128.2, 128.1, 115.4, 115.2, 100.2 (d,  $J = 13.6$  Hz), 98.1 (d,  $J = 103.4$  Hz), 18.9 (d,  $J = 5.7$  Hz).  $^{31}\text{P NMR}$  (162 MHz,  $\text{CDCl}_3$ )  $\delta$  31.76.  $^{19}\text{F NMR}$  (376 MHz,  $\text{CDCl}_3$ )  $\delta$  -114.71. **MS (ESI):** found  $[\text{M}+\text{H}]^+$  362.8.

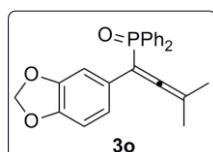

**(1-(benzo[d][1,3]dioxol-5-yl)-3-methylbuta-1,2-dien-1-yl)diphenylphosphine oxide (3o) (70%)** white solid;  $^1\text{H NMR}$  (400 MHz,  $\text{CDCl}_3$ )  $\delta$  7.81 – 7.68 (m, 4H), 7.59 – 7.36 (m, 6H), 7.23 – 7.12 (m, 1H), 7.06 (d,  $J = 1.3$  Hz, 1H), 6.68 (t,  $J = 8.4$  Hz, 1H), 5.86 (s, 2H), 1.44 (d,  $J = 6.0$  Hz, 6H).  $^{13}\text{C NMR}$  (101 MHz,  $\text{CDCl}_3$ )  $\delta$  209.3 (d,  $J = 6.3$  Hz), 147.6, 146.8, 132.7 (d,  $J = 105.8$  Hz), 131.5, 131.4, 128.1 (d,  $J = 12.2$  Hz), 127.0 (d,  $J = 8.3$  Hz), 122.0, 121., 108.4 (d,  $J = 5.7$  Hz), 108.2, 100.8, 100.0 (d,  $J = 13.5$  Hz), 98.7 (d,  $J = 103.8$  Hz), 18.9 (d,  $J = 5.7$  Hz).  $^{31}\text{P NMR}$  (162 MHz,  $\text{CDCl}_3$ )  $\delta$  31.69. **MS (ESI):** found  $[\text{M}+\text{H}]^+$  388.8.

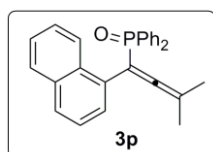

**(3-methyl-1-(naphthalen-1-yl)buta-1,2-dien-1-yl)diphenylphosphine oxide (3p) (86%)** white solid;  $^1\text{H NMR}$  (400 MHz,  $\text{CDCl}_3$ )  $\delta$  8.22 (t,  $J = 7.8$  Hz, 1H), 7.87 – 7.73 (m, 6H), 7.68 (d,  $J = 8.2$  Hz, 1H), 7.54 – 7.46 (m, 1H), 7.38 (m, 8H), 1.52 (d,  $J = 6.1$  Hz, 6H).  $^{13}\text{C NMR}$  (101 MHz,  $\text{CDCl}_3$ )  $\delta$  211.1 (d,  $J = 5.9$  Hz), 133.9, 133.1, 131.8 (d,  $J = 50.6$  Hz), 131.5 (d,  $J = 9.3$  Hz), 131.4 (d,  $J = 2.8$  Hz), 130.4 (d,  $J = 7.4$  Hz), 128.5, 128.0 (d,  $J = 12.1$  Hz), 127.9, 127.3 (d,  $J = 3.6$  Hz), 125.9, 125.4, 125.2, 124.8, 97.6 (d,  $J = 13.9$  Hz), 96.4 (d,  $J = 101.1$  Hz), 18.8 (d,  $J = 5.8$  Hz).  $^{31}\text{P NMR}$  (162 MHz,  $\text{CDCl}_3$ )  $\delta$  30.63. **MS (ESI):** found  $[\text{M}+\text{H}]^+$  394.8.

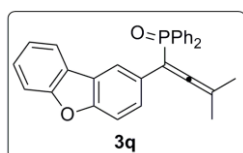

**(1-(dibenzo[b,d]furan-2-yl)-3-methylbuta-1,2-dien-1-yl)diphenylphosphine oxide (3q) (82%)** white solid;  $^1\text{H NMR}$  (400 MHz,  $\text{CDCl}_3$ )  $\delta$  8.26 (s, 1H), 7.90 (d,  $J = 7.5$  Hz, 1H), 7.85 – 7.75 (m, 4H), 7.72 (dd,  $J = 8.6, 1.3$  Hz, 1H), 7.54 – 7.36 (m, 9H), 7.25 (dd,  $J = 14.8, 7.6$  Hz, 1H), 1.50 (d,  $J = 6.0$  Hz, 6H).  $^{13}\text{C NMR}$  (101 MHz,  $\text{CDCl}_3$ )  $\delta$  209.9 (d,  $J = 6.2$  Hz), 156.3, 155.4, 132.8 (d,  $J = 105.8$  Hz), 131.6, 131.5 (d,  $J = 2.8$  Hz), 131.4, 128.3, 128.2, 128.1, 127.6 (d,  $J = 5.2$  Hz), 127.0, 124.4, 124.0, 122.5, 120.9, 120.4, 120.3, 111.5 (d,  $J = 12.9$  Hz), 100.0 (d,  $J = 13.6$  Hz), 98.9 (d,  $J = 103.0$  Hz), 19.0 (d,  $J = 5.7$  Hz).  $^{31}\text{P NMR}$  (162 MHz,  $\text{CDCl}_3$ )  $\delta$  31.93. **MS (ESI):** found  $[\text{M}+\text{H}]^+$  435.0.



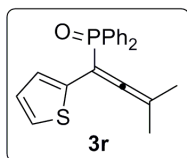

**(3-methyl-1-(thiophen-2-yl)buta-1,2-dien-1-yl)diphenylphosphine oxide (3r)** (40%) Light yellow solid;  $^1\text{H}$  NMR (400 MHz,  $\text{CDCl}_3$ )  $\delta$  7.74 (m, 4H), 7.57 – 7.48 (m, 2H), 7.48 – 7.37 (m, 4H), 7.34 – 7.23 (m, 1H), 7.19 – 7.07 (m, 1H), 6.86 (dd,  $J = 5.1, 3.7$  Hz, 1H), 1.47 (d,  $J = 5.9$  Hz, 6H).  $^{13}\text{C}$  NMR (101 MHz,  $\text{CDCl}_3$ )  $\delta$  208.3 (d,  $J = 5.5$  Hz), 136.4 (d,  $J = 12.1$  Hz), 132.8, 131.8, 131.7 (d,  $J = 2.8$  Hz), 131.6, 131.5, 128.2 (d,  $J = 12.3$  Hz), 127.7, 126.8 (d,  $J = 2.5$  Hz), 124.8, 100.9 (d,  $J = 13.1$  Hz), 94.5 (d,  $J = 103.3$  Hz), 19.1 (d,  $J = 5.6$  Hz).  $^{31}\text{P}$  NMR (162 MHz,  $\text{CDCl}_3$ )  $\delta$  30.77. MS (ESI): found  $[\text{M}+\text{H}]^+$  351.0.

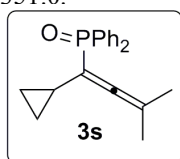

**(1-cyclopropyl-3-methylbuta-1,2-dien-1-yl)diphenylphosphine oxide (3s)** (86%) Colorless liquid;  $^1\text{H}$  NMR (400 MHz,  $\text{CDCl}_3$ )  $\delta$  7.90 – 7.64 (m, 4H), 7.62 – 7.38 (m, 6H), 1.43 (s, 3H), 1.40 (s, 3H), 0.90 – 0.64 (m, 2H), 0.61 – 0.35 (m, 2H).  $^{13}\text{C}$  NMR (101 MHz,  $\text{CDCl}_3$ )  $\delta$  204.9 (d,  $J = 7.7$  Hz), 132.9, 131.9, 131.5, 131.4, 128.0, 127.9, 100.6 (d,  $J = 105.1$  Hz), 100.5 (d,  $J = 14.0$  Hz), 19.2 (d,  $J = 5.9$  Hz), 8.6 (d,  $J = 3.2$  Hz), 8.4 (d,  $J = 12.5$  Hz).  $^{31}\text{P}$  NMR (162 MHz,  $\text{CDCl}_3$ )  $\delta$  32.09. MS (ESI): found  $[\text{M}+\text{H}]^+$  308.7.

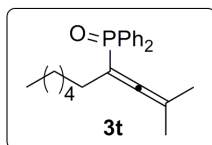

**(2-methyldeca-2,3-dien-4-yl)diphenylphosphine oxide (3t)** (72%) Colorless liquid;  $^1\text{H}$  NMR (400 MHz,  $\text{CDCl}_3$ )  $\delta$  7.82 – 7.59 (m, 4H), 7.58 – 7.35 (m, 6H), 2.21 (dd,  $J = 15.3, 8.0$  Hz, 2H), 1.55 – 1.37 (m, 8H), 1.35 – 1.13 (m, 6H), 0.84 (t,  $J = 6.9$  Hz, 3H).  $^{13}\text{C}$  NMR (101 MHz,  $\text{CDCl}_3$ )  $\delta$  207.5 (d,  $J = 6.8$  Hz), 132.6 (d,  $J = 103.3$  Hz), 131.5, 131.4, 131.4 (d,  $J = 2.7$  Hz), 128.1, 128.0, 98.4 (d,  $J = 14.7$  Hz), 96.5 (d,  $J = 102.9$  Hz), 31.6, 28.7, 28.3 (d,  $J = 5.9$  Hz), 27.4 (d,  $J = 8.1$  Hz), 22.5, 19.2 (d,  $J = 6.1$  Hz), 14.0.  $^{31}\text{P}$  NMR (162 MHz,  $\text{CDCl}_3$ )  $\delta$  31.71. MS (ESI): found  $[\text{M}+\text{H}]^+$  352.9.

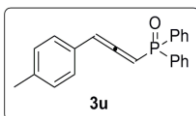

**Diphenyl(3-p-tolylpropa-1,2-dien-1-yl)phosphine oxide (3u)** (60%) white solid;  $^1\text{H}$  NMR (400 MHz,  $\text{CDCl}_3$ )  $\delta$  7.84 – 7.71 (m, 4H), 7.49 (ddd,  $J = 14.7, 7.3, 1.4$  Hz, 2H), 7.45 – 7.37 (m, 4H), 7.05 (dd,  $J = 18.8, 8.1$  Hz, 4H), 6.35 – 6.19 (m, 2H), 2.31 (s, 3H).  $^{13}\text{C}$  NMR (101 MHz,  $\text{CDCl}_3$ )  $\delta$  213.1, 137.7, 132.9, 132.7, 131.9 (d,  $J = 2.5$  Hz), 131.8, 131.7, 131.4, 131.3 (d,  $J = 3.0$  Hz), 131.2, 129.4 (d,  $J = 1.3$  Hz), 128.4 (d,  $J = 2.2$  Hz), 128.3 (d,  $J = 2.2$  Hz), 128.2, 128.1, 126.9 (d,  $J = 2.2$  Hz), 96.1 (d,  $J = 13.6$  Hz), 89.5 (d,  $J = 103.1$  Hz), 21.2.  $^{31}\text{P}$  NMR (162 MHz,  $\text{CDCl}_3$ )  $\delta$  23.93. MS (ESI): found  $[\text{M}+\text{H}]^+$  331.1.

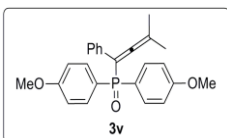

**bis(4-methoxyphenyl)(3-methyl-1-phenylbuta-1,2-dien-1-yl)phosphine oxide (3v) (40%)** white solid;  $^1\text{H NMR}$  (400 MHz,  $\text{CDCl}_3$ )  $\delta$  7.71 – 7.61 (m, 4H), 7.58 (d,  $J = 8.0$  Hz, 2H), 7.23 (t,  $J = 7.5$  Hz, 2H), 7.15 (dd,  $J = 8.4, 6.3$  Hz, 1H), 6.97 – 6.87 (m, 4H), 3.82 (s, 6H), 1.50 (d,  $J = 6.0$  Hz, 6H).  $^{13}\text{C NMR}$  (101 MHz,  $\text{CDCl}_3$ )  $\delta$  209.8 (d,  $J = 6.1$  Hz), 162.0 (d,  $J = 2.8$  Hz), 133.6 (d,  $J = 7.9$  Hz), 133.3, 133.2, 128.4, 128.2 (d,  $J = 4.9$  Hz), 127.0, 125.1, 124.0, 113.7 (d,  $J = 13.2$  Hz), 99.6 (d,  $J = 103.5$  Hz), 99.4 (d,  $J = 13.5$  Hz), 55.2, 19.1 (d,  $J = 5.7$  Hz).  $^{31}\text{P NMR}$  (162 MHz,  $\text{CDCl}_3$ )  $\delta$  31.28. **MS (ESI):** found  $[\text{M}+\text{H}]^+$  404.9.

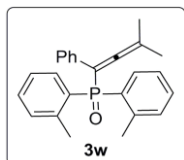

**(3-methyl-1-phenylbuta-1,2-dien-1-yl)di-*o*-tolylphosphine oxide (3w) (48%)** white solid;  $^1\text{H NMR}$  (400 MHz,  $\text{CDCl}_3$ )  $\delta$  7.72 (d,  $J = 8.0$  Hz, 2H), 7.42 – 7.32 (m, 4H), 7.27 (dt,  $J = 7.6, 6.3$  Hz, 4H), 7.20 (t,  $J = 7.4$  Hz, 1H), 7.13 (t,  $J = 7.5$  Hz, 2H), 2.60 (s, 6H), 1.38 (d,  $J = 6.0$  Hz, 6H).  $^{13}\text{C NMR}$  (101 MHz,  $\text{CDCl}_3$ )  $\delta$  208.7 (d,  $J = 6.2$  Hz), 143.0 (d,  $J = 7.6$  Hz), 134.0 (d,  $J = 7.3$  Hz), 132.4 (d,  $J = 12.4$  Hz), 131.9, 131.7, 131.6, 131.5, 131.4, 130.9, 128.5 (d,  $J = 3.0$  Hz), 127.1, 125.1 (d,  $J = 12.9$  Hz), 99.9 (d,  $J = 13.6$  Hz), 98.5 (d,  $J = 101.6$  Hz), 21.8 (d,  $J = 4.1$  Hz), 18.5 (d,  $J = 5.7$  Hz).  $^{31}\text{P NMR}$  (162 MHz,  $\text{CDCl}_3$ )  $\delta$  37.73. **MS (ESI):** found  $[\text{M}+\text{H}]^+$  372.8.

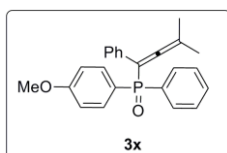

**(4-methoxyphenyl)(3-methyl-1-phenylbuta-1,2-dien-1-yl)(phenyl)phosphine oxide (3x) (51%)** white solid;  $^1\text{H NMR}$  (400 MHz,  $\text{CDCl}_3$ )  $\delta$  7.78 – 7.63 (m, 4H), 7.59 (d,  $J = 8.0$  Hz, 2H), 7.52 – 7.35 (m, 3H), 7.23 (t,  $J = 7.5$  Hz, 2H), 7.15 (t,  $J = 7.3$  Hz, 1H), 6.94 (d,  $J = 8.8$  Hz, 2H), 3.81 (s, 3H), 1.48 (d,  $J = 6.0$  Hz, 6H).  $^{13}\text{C NMR}$  (101 MHz,  $\text{CDCl}_3$ )  $\delta$  209.8 (d,  $J = 6.1$  Hz), 162.2 (d,  $J = 2.8$  Hz), 133.5 (d,  $J = 106.9$  Hz), 133.4 (d,  $J = 8.0$  Hz), 133.3, 133.0, 131.4, 131.3 (d,  $J = 4.5$  Hz), 128.4, 128.2, 128.1, 128.0, 127.9, 127.1, 123.9 (d,  $J = 111.5$  Hz), 113.8 (d,  $J = 13.2$  Hz), 99.7 (d,  $J = 13.5$  Hz), 99.3 (d,  $J = 103.4$  Hz), 55.2, 19.0 (dd,  $J = 5.7, 3.6$  Hz).  $^{31}\text{P NMR}$  (162 MHz,  $\text{CDCl}_3$ )  $\delta$  31.47. **MS (ESI):** found  $[\text{M}+\text{H}]^+$  374.8.

## 8. Copies of NMR spectra

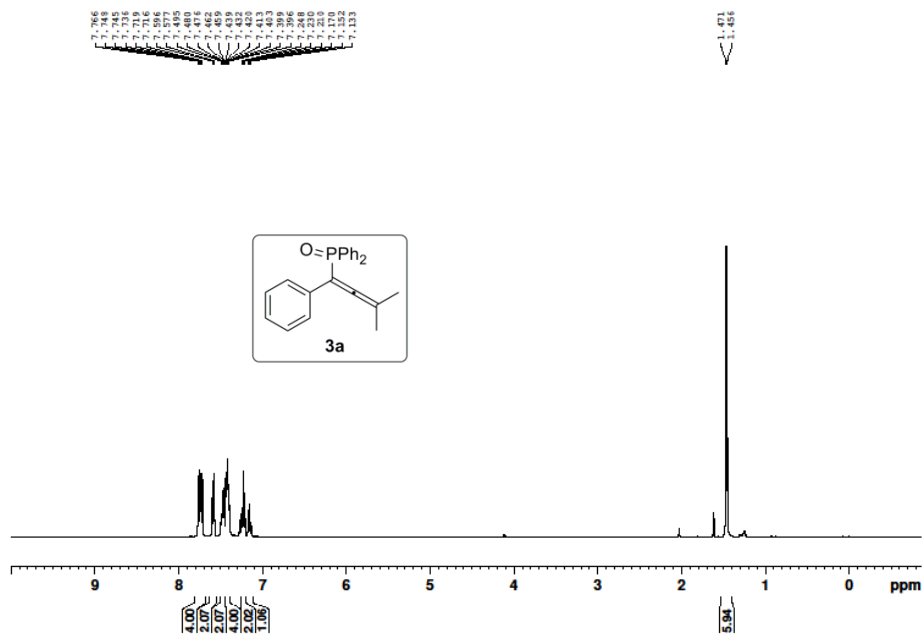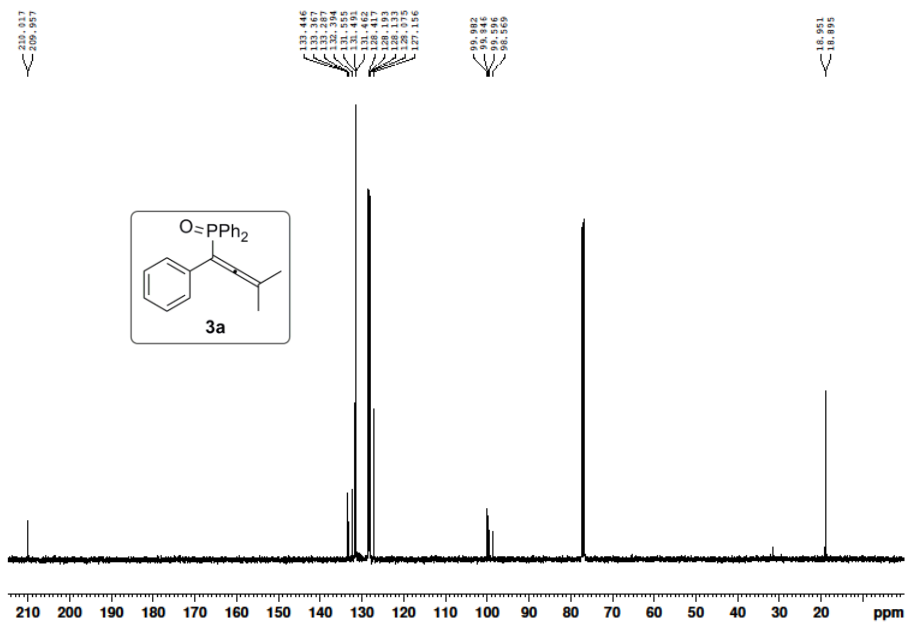

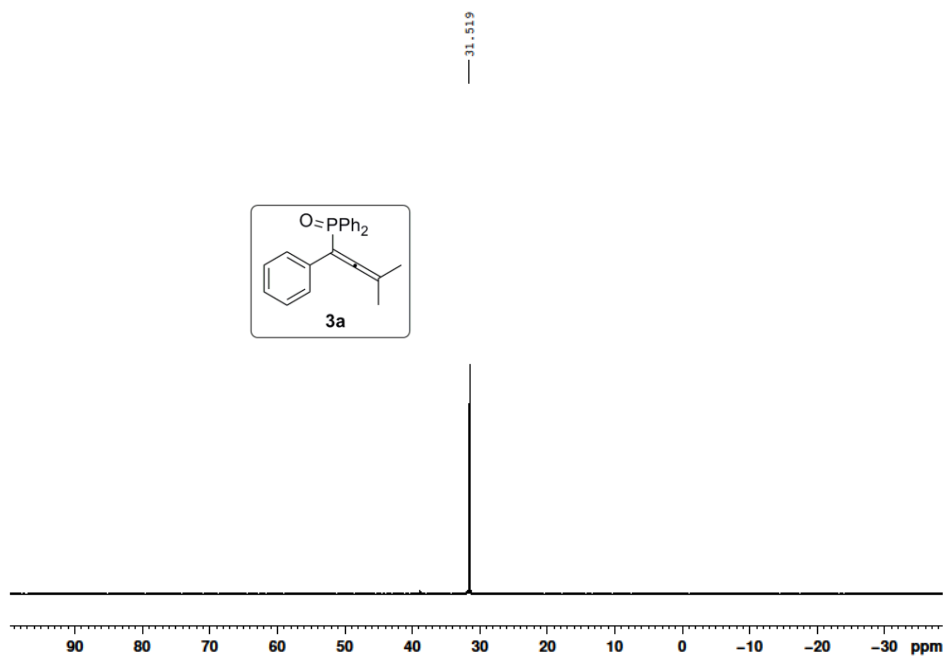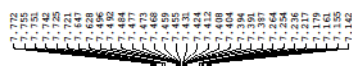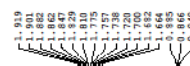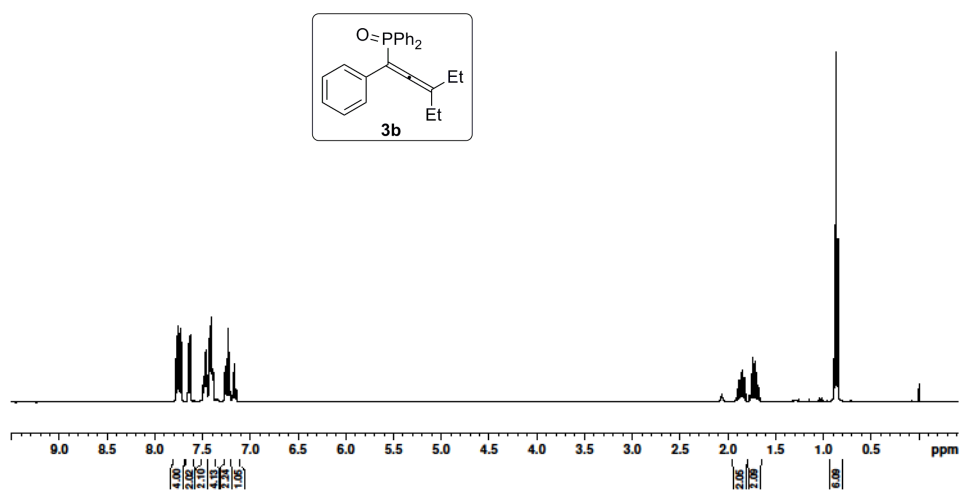

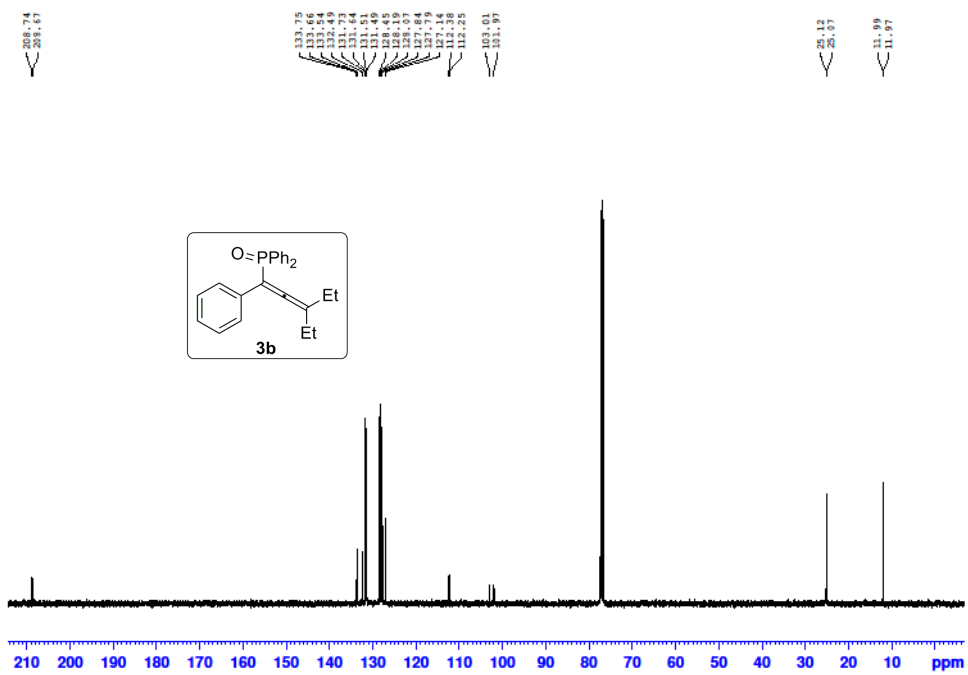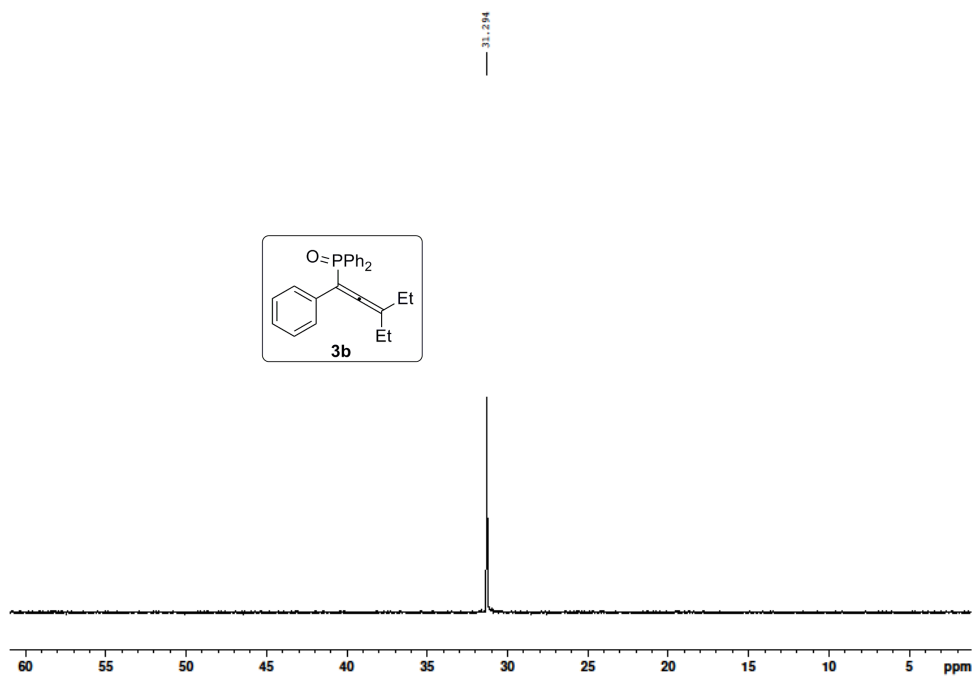

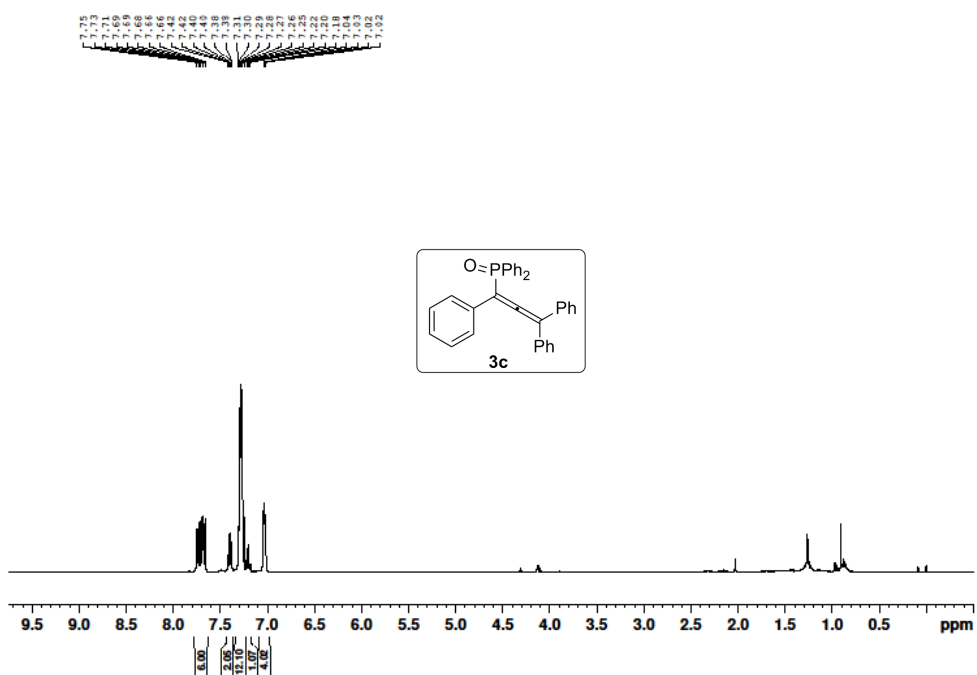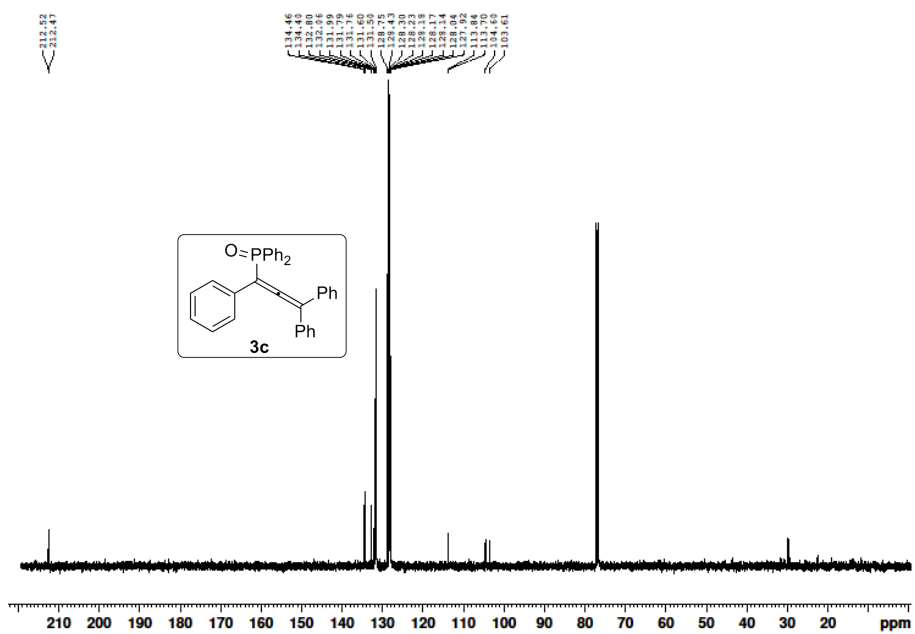

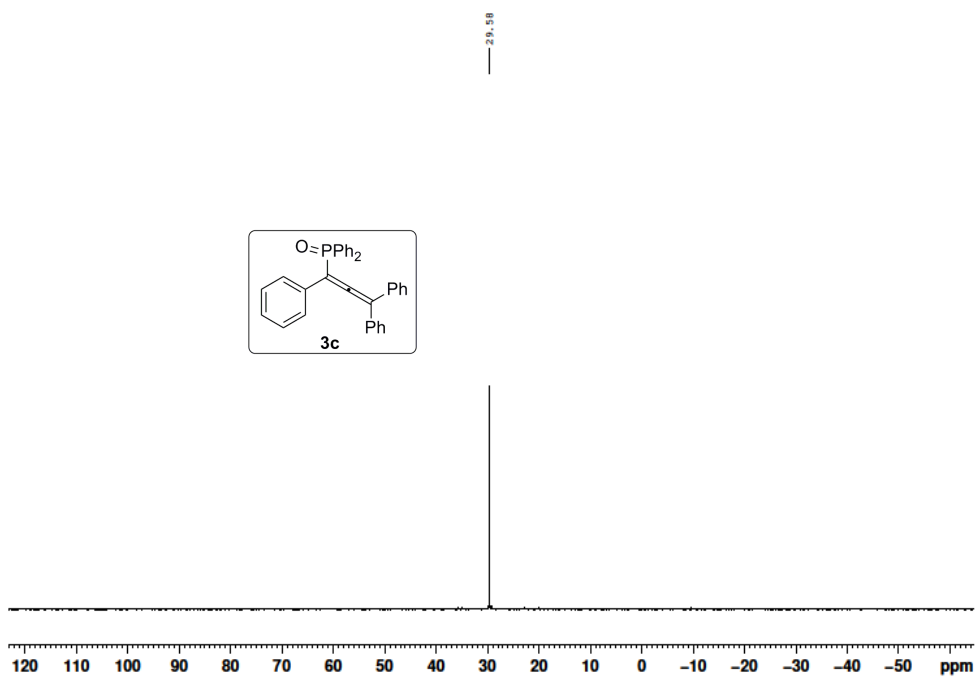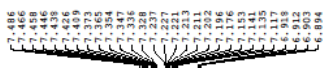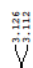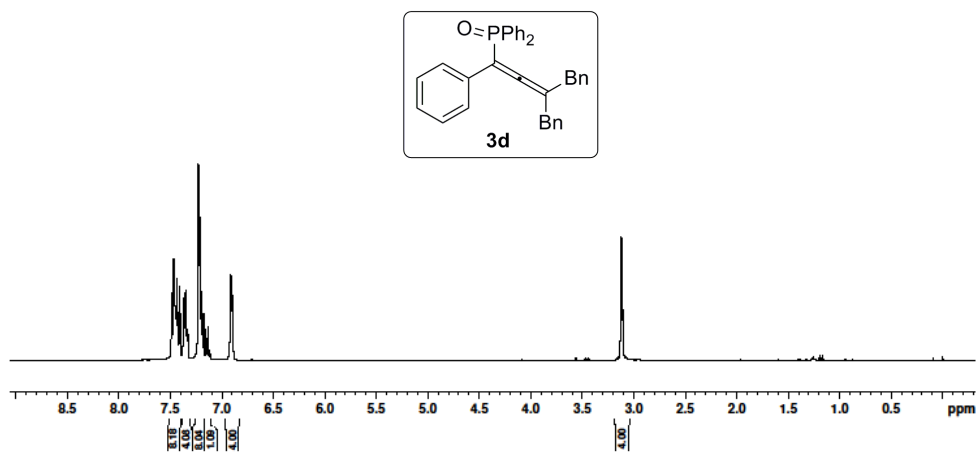

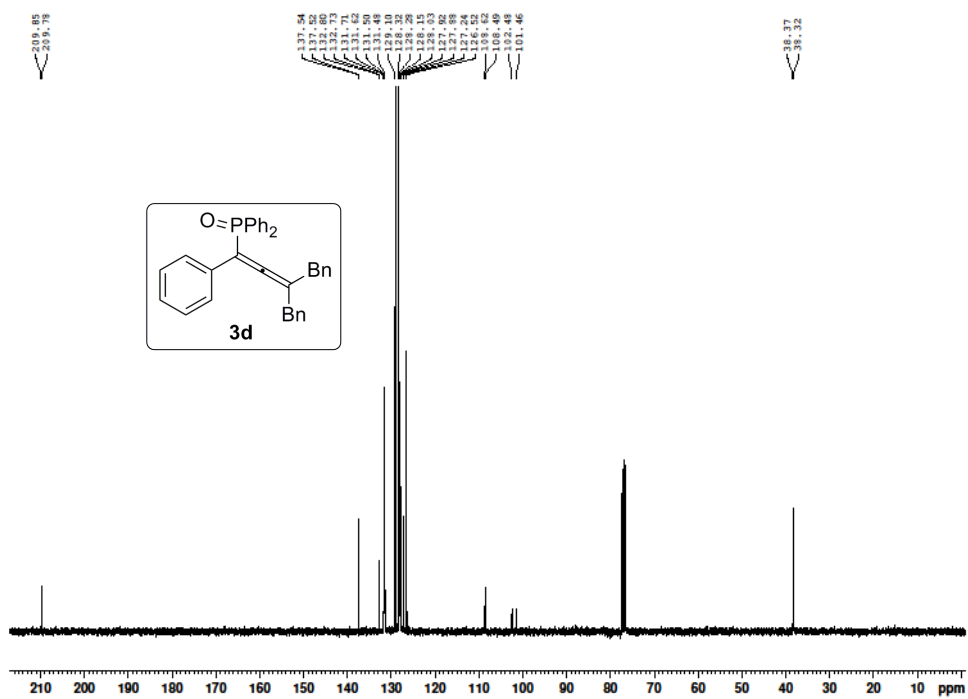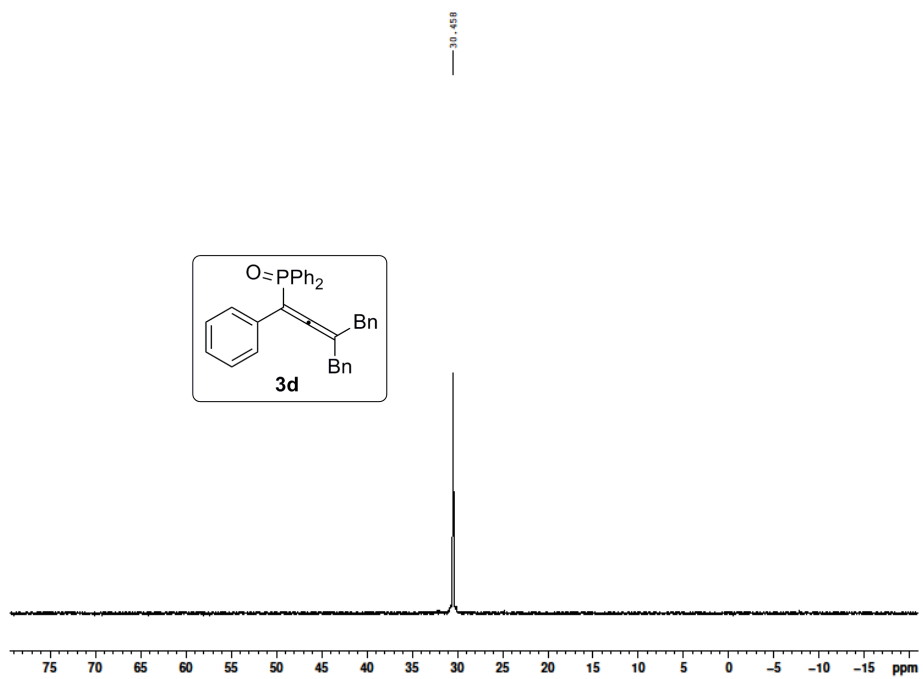





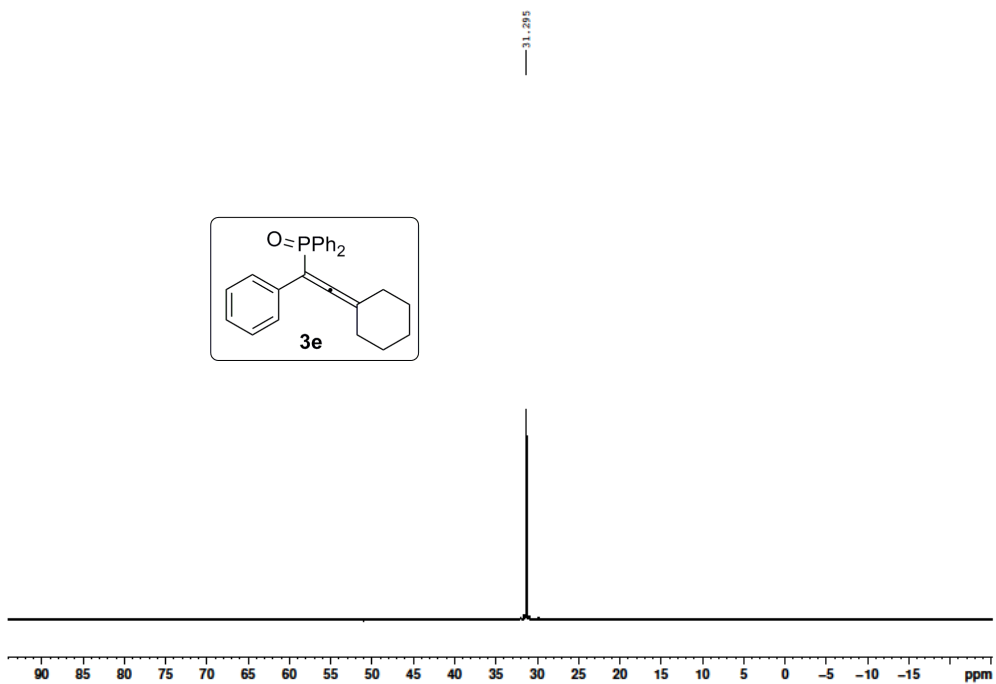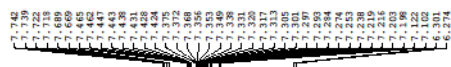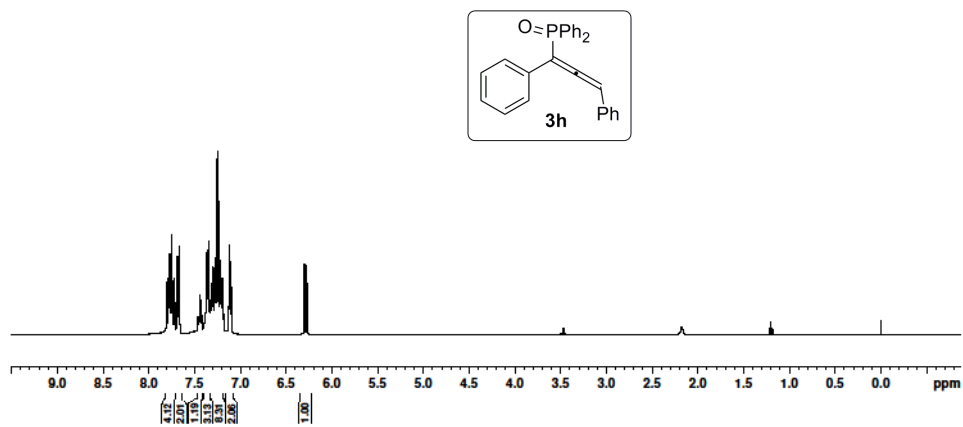

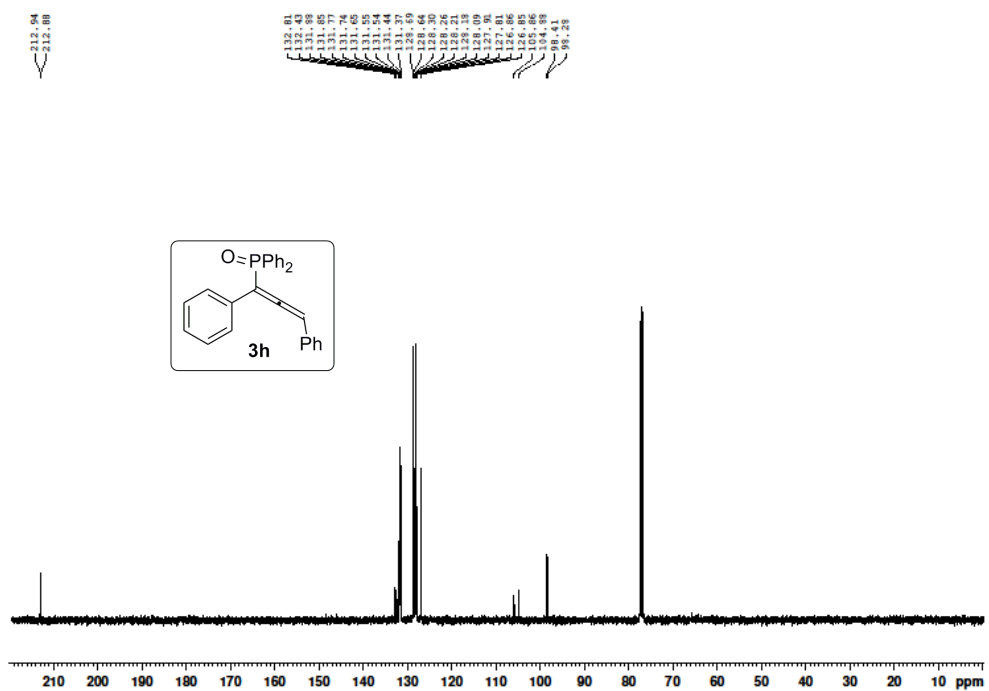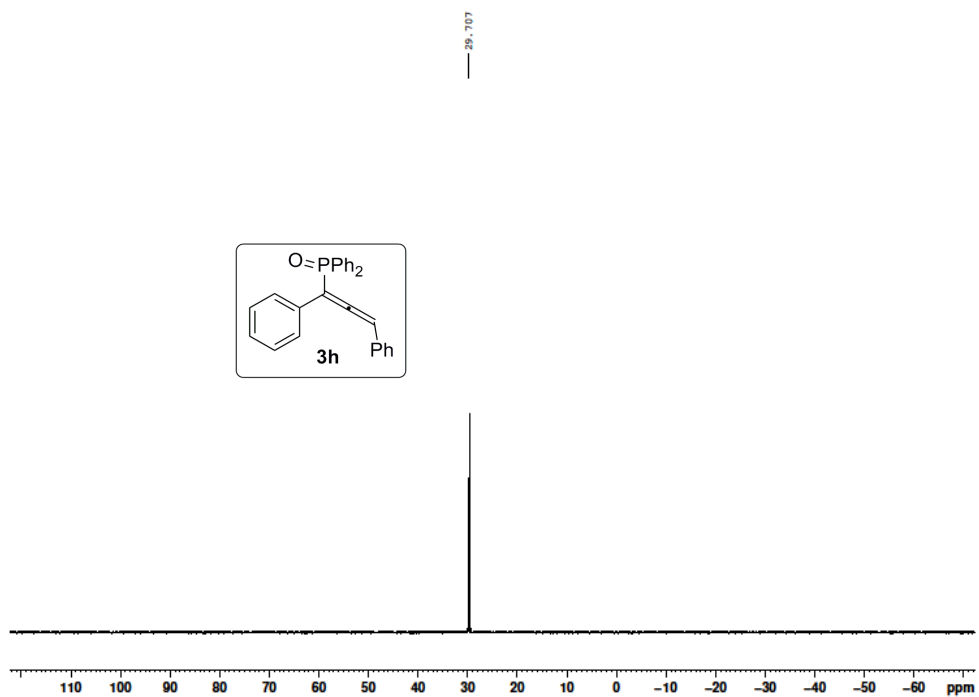

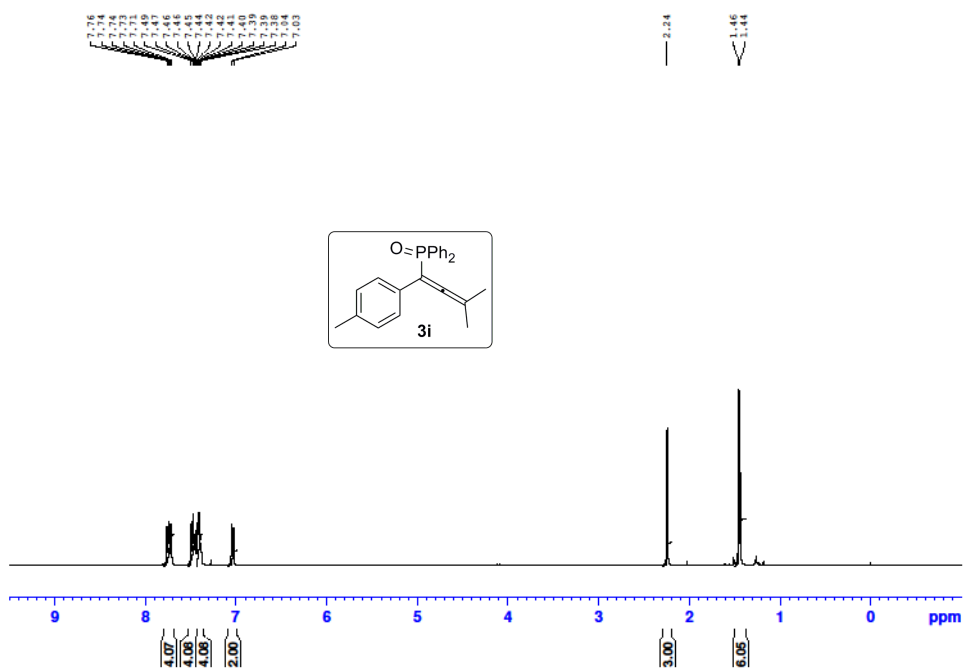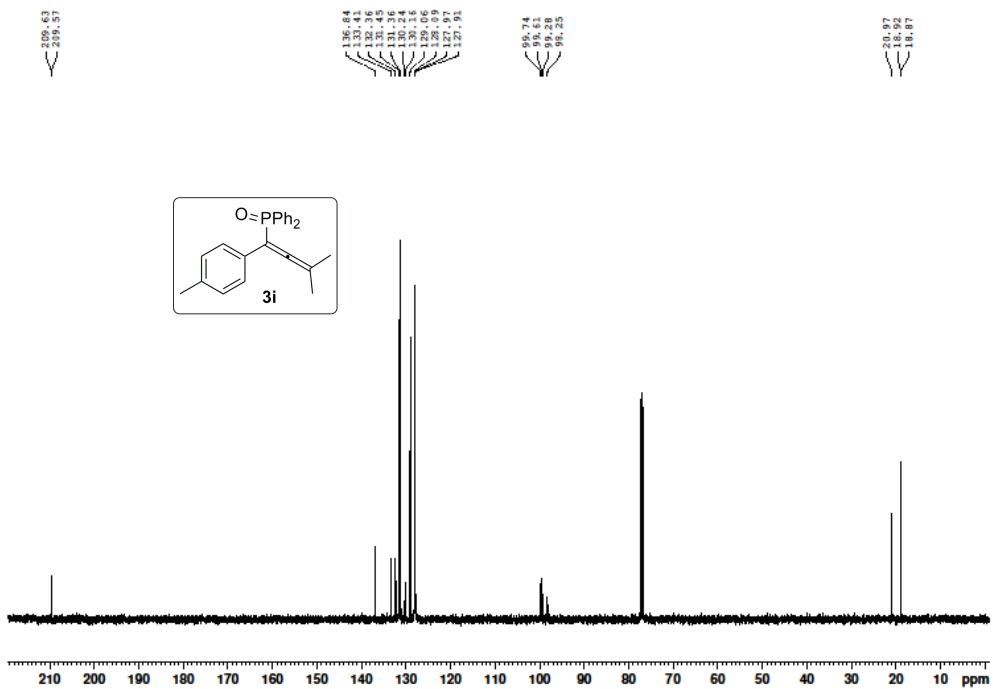

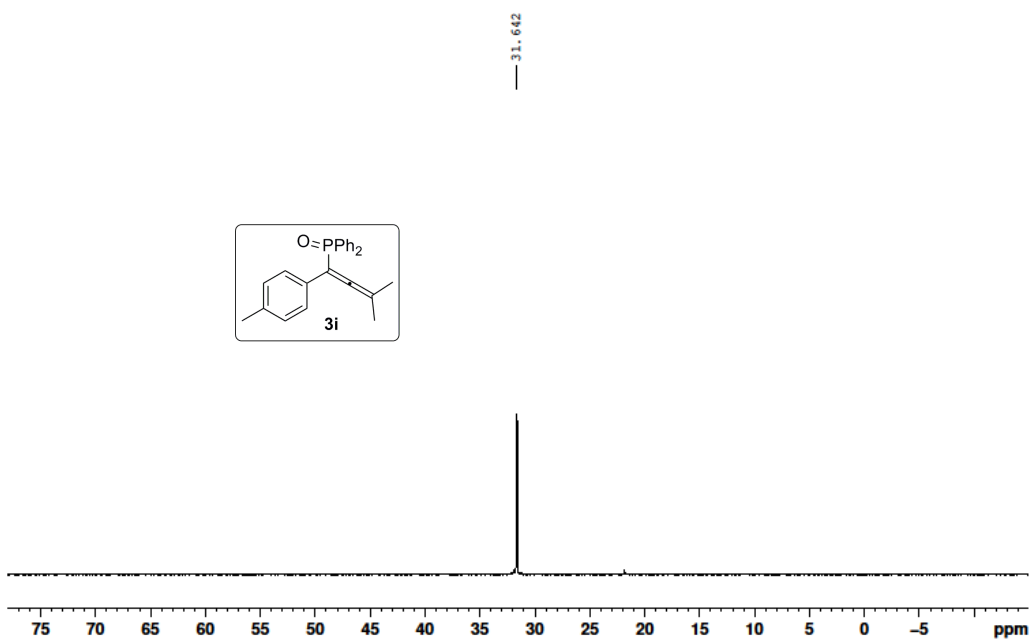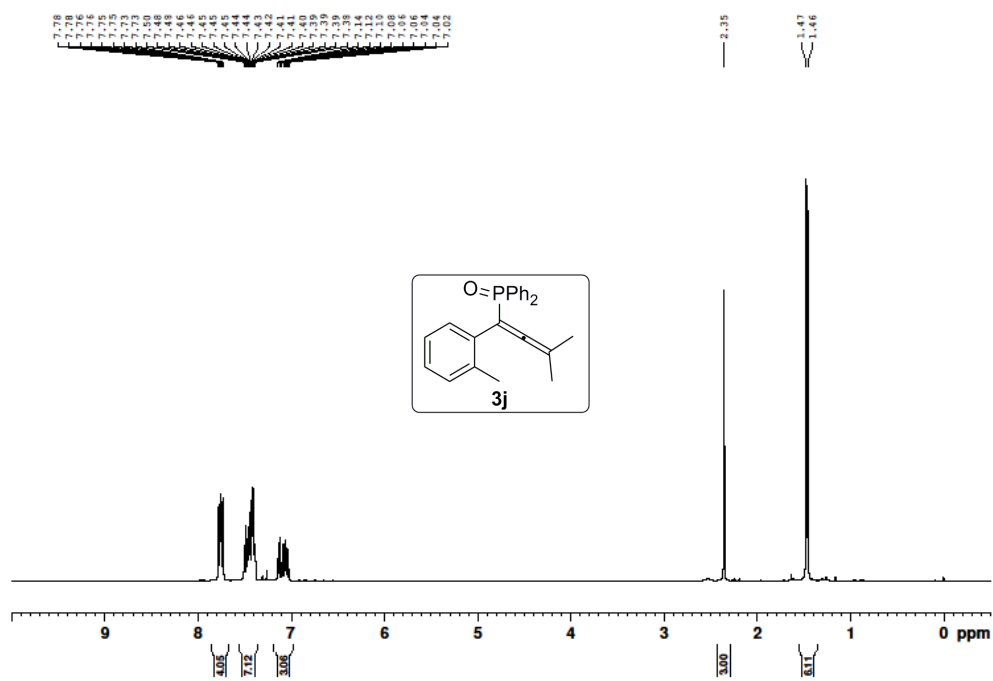

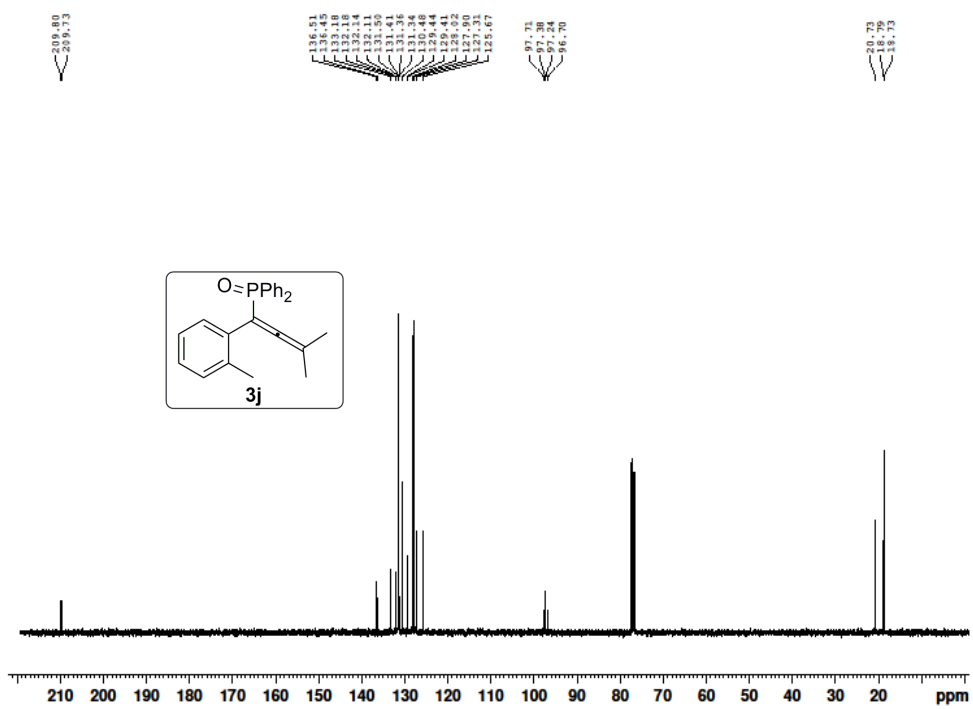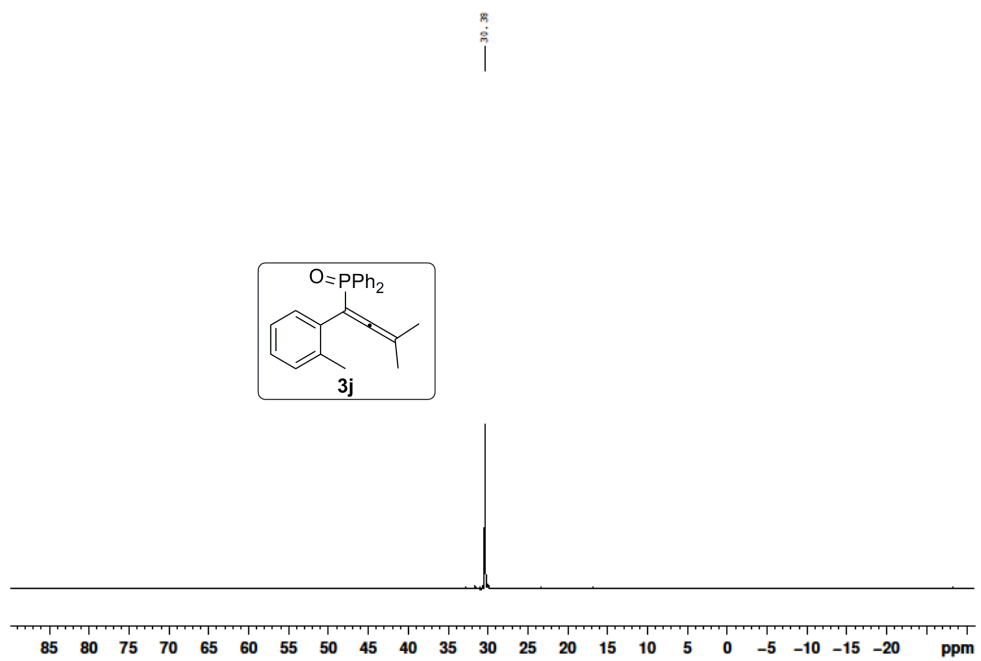

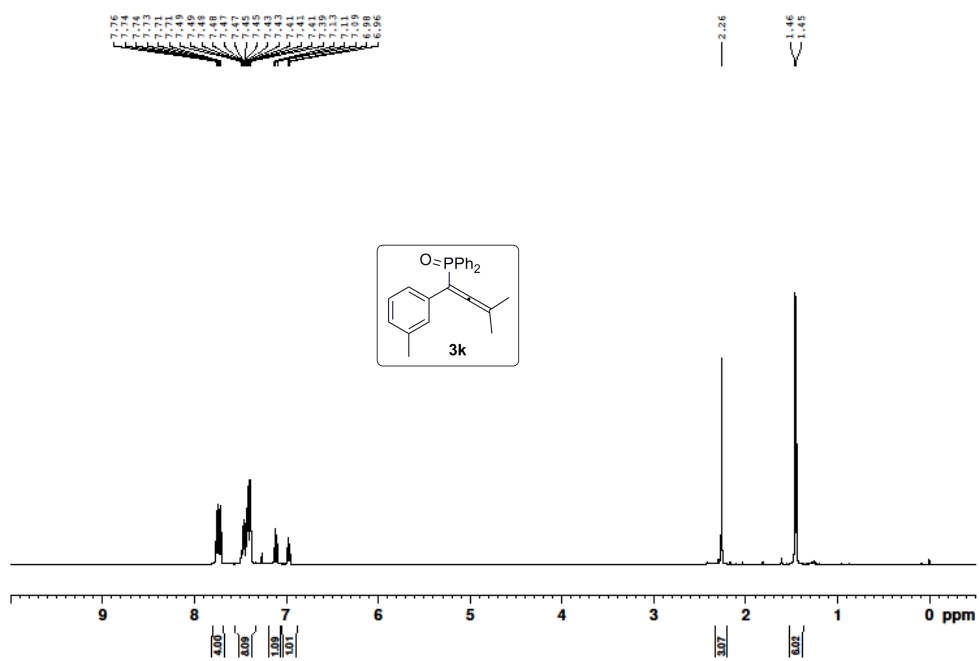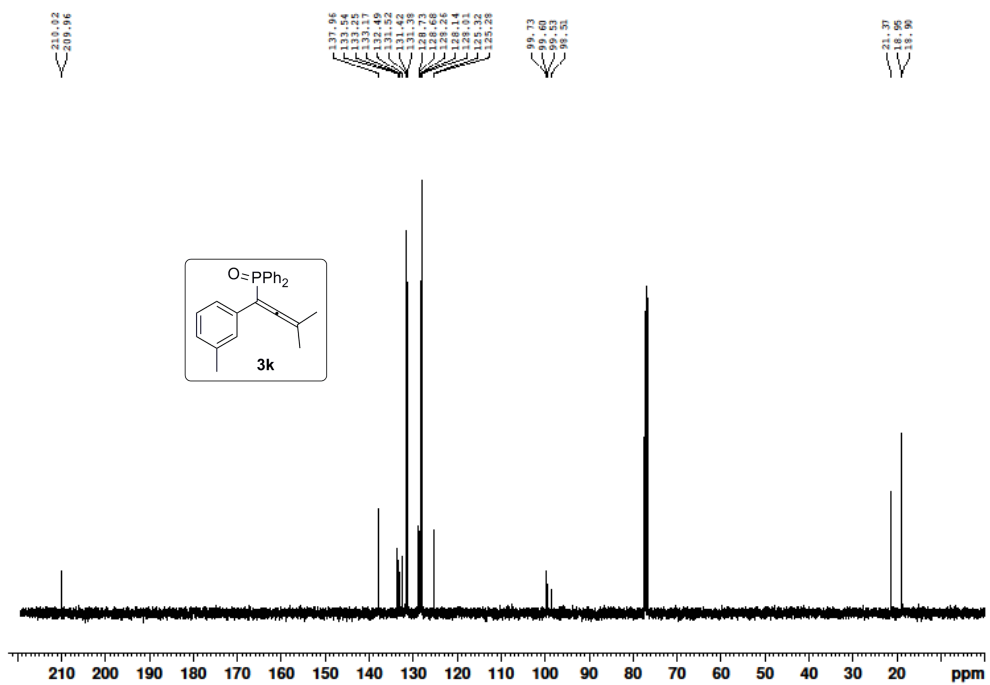

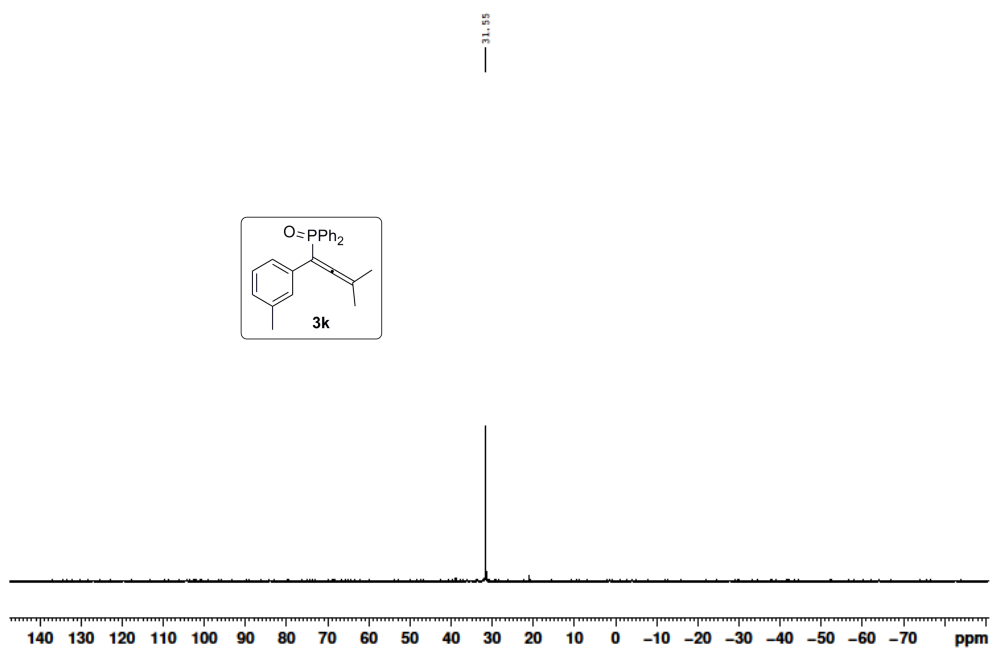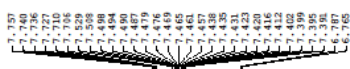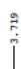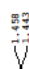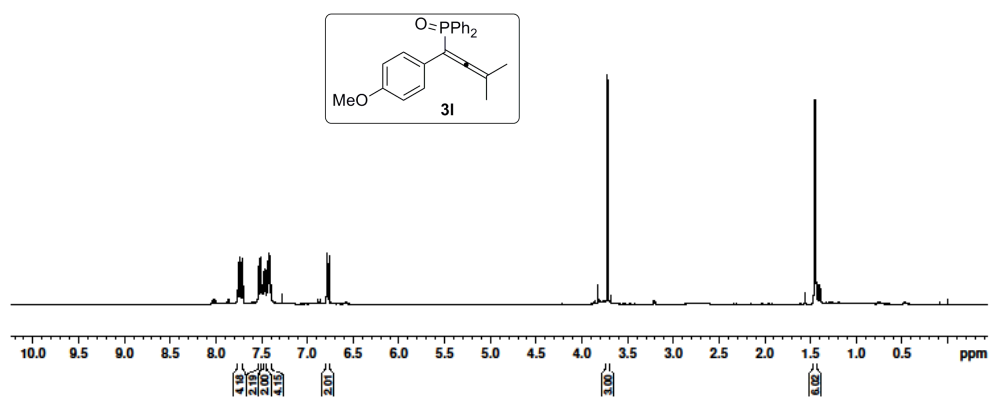



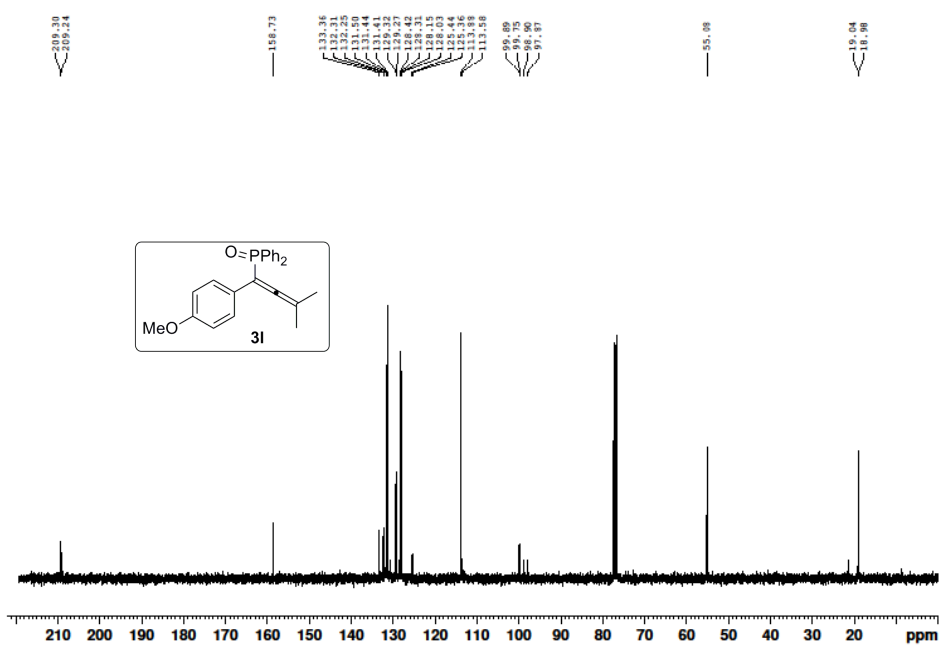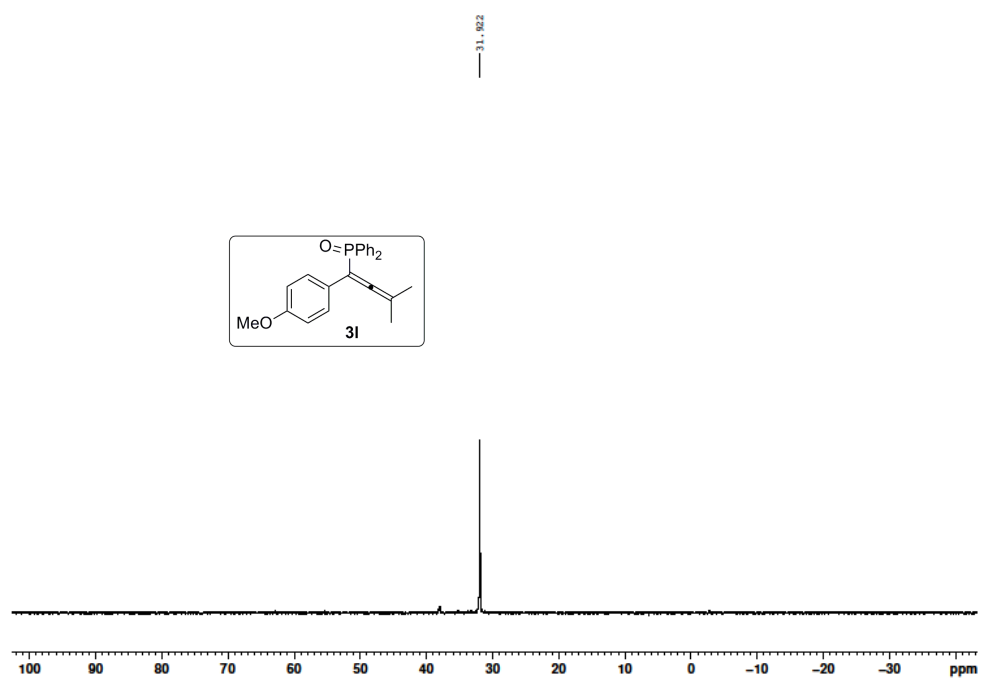

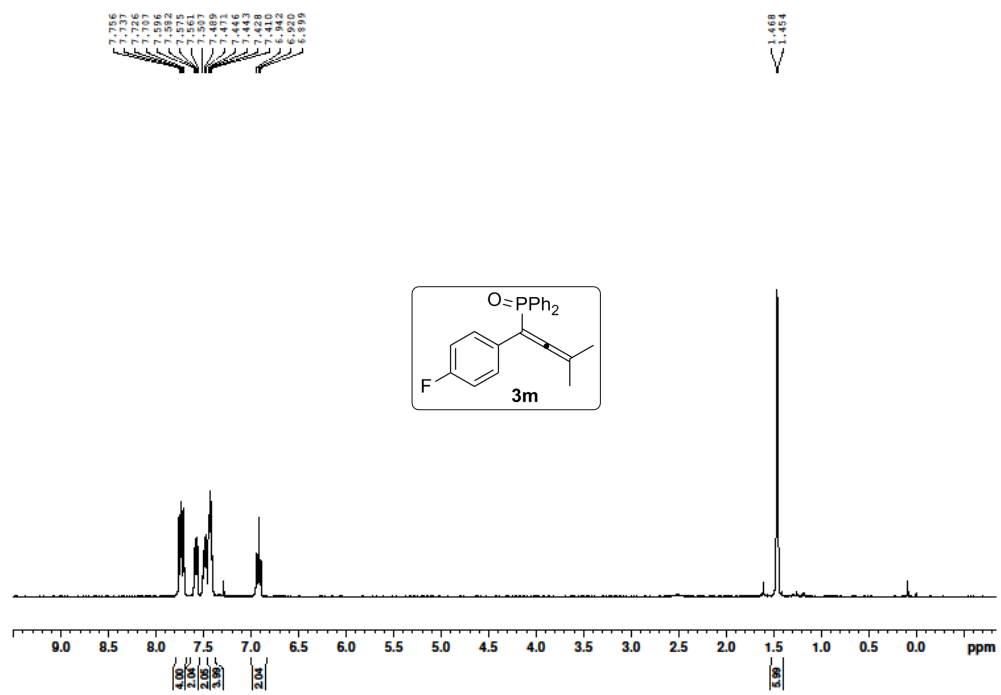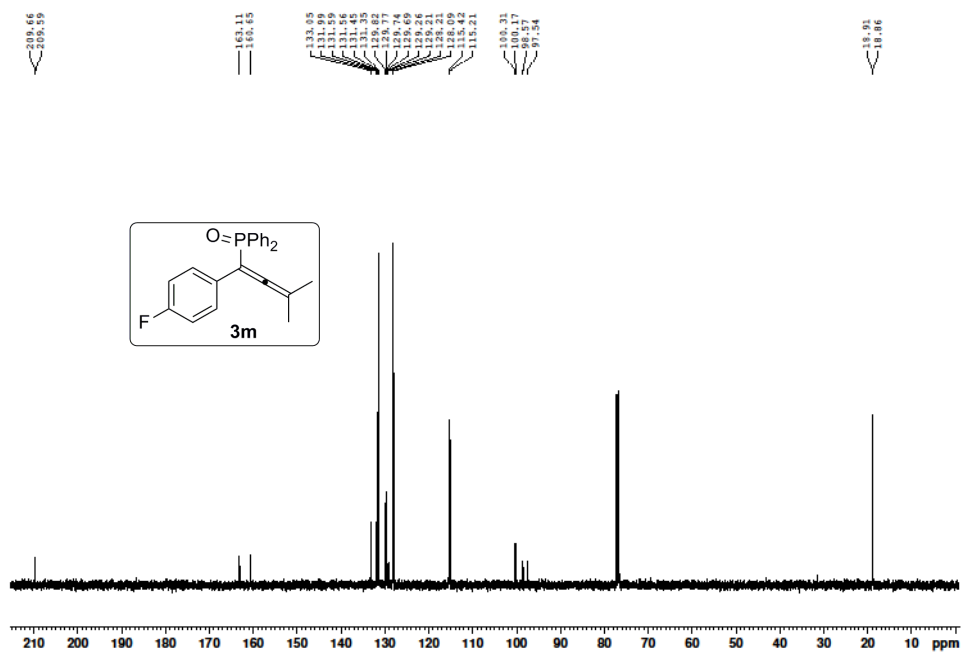

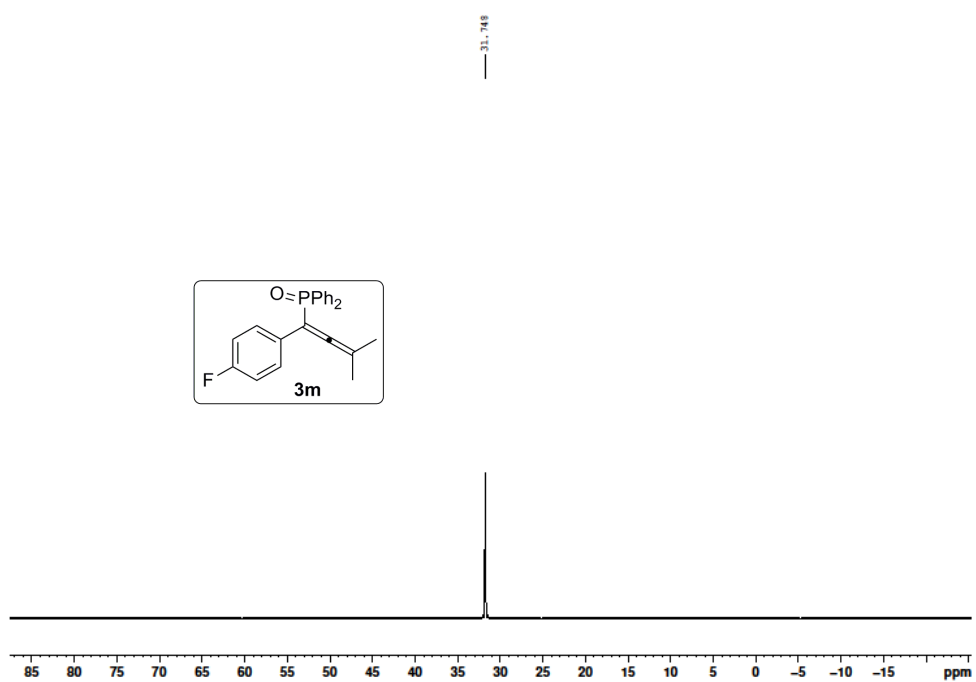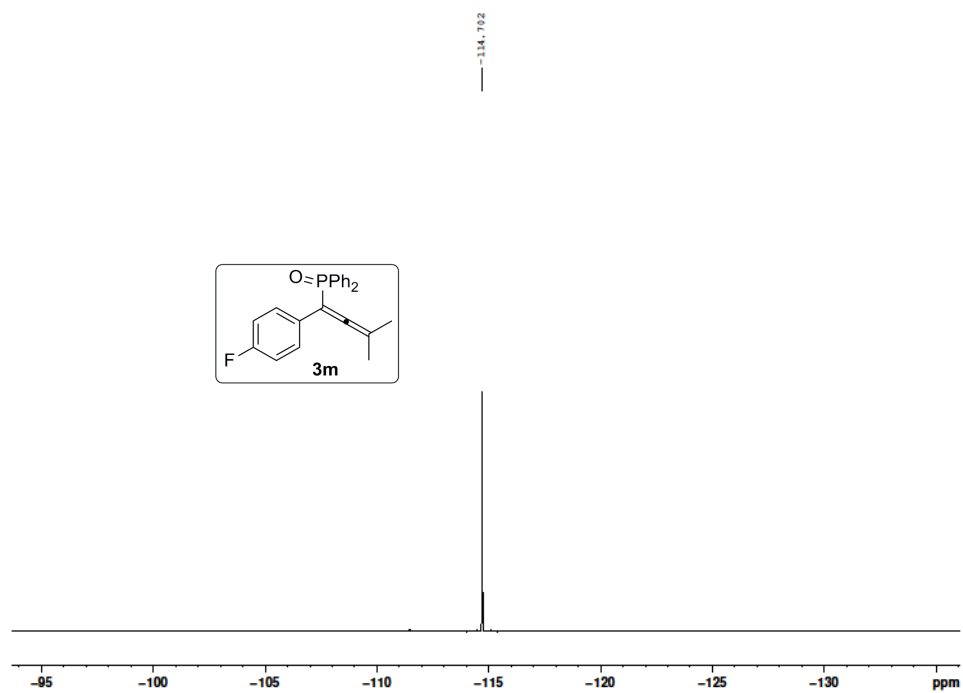

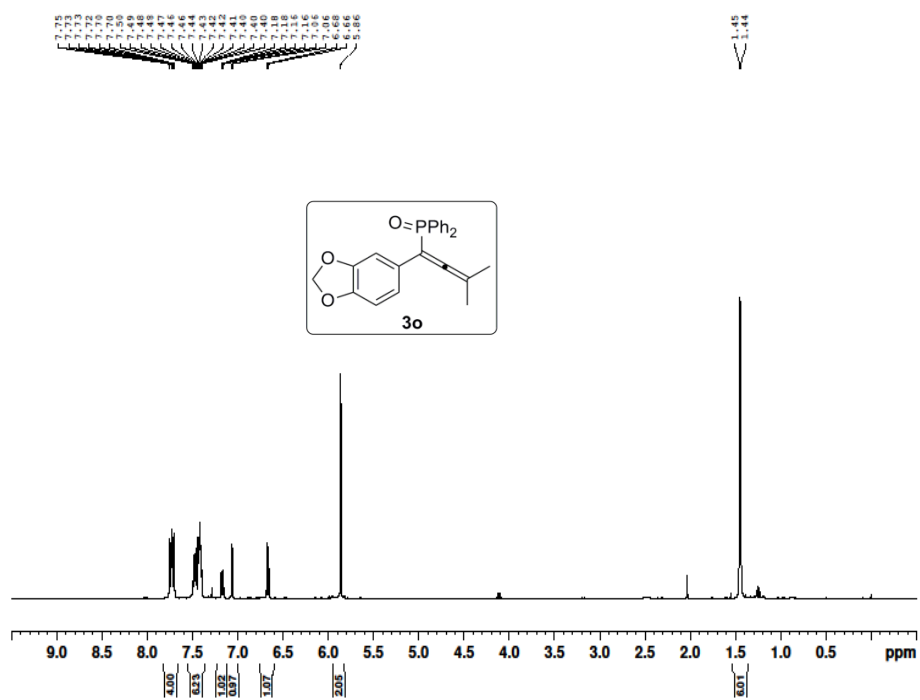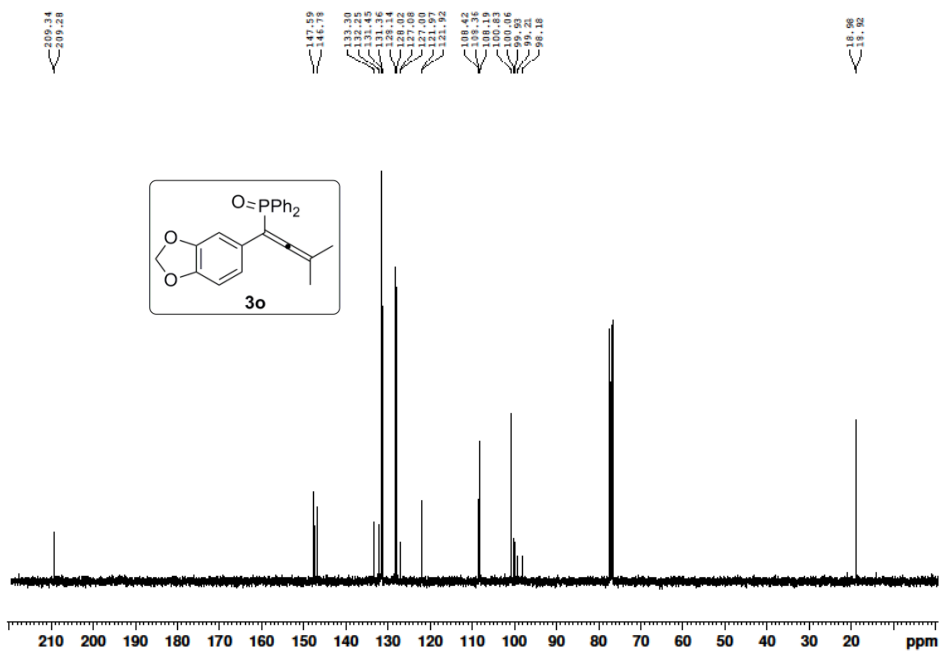

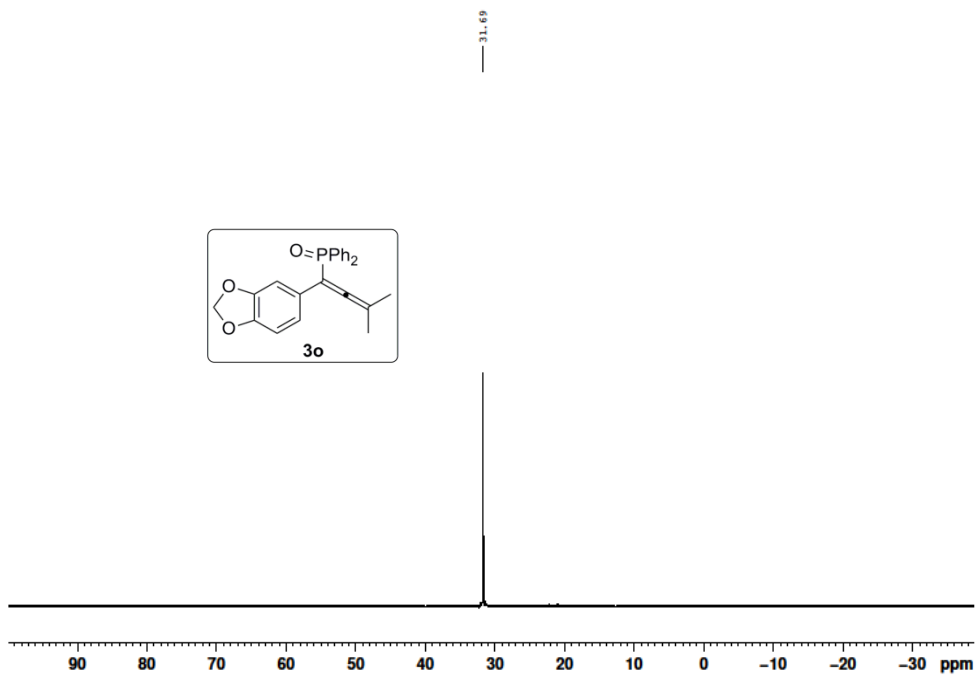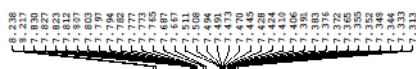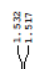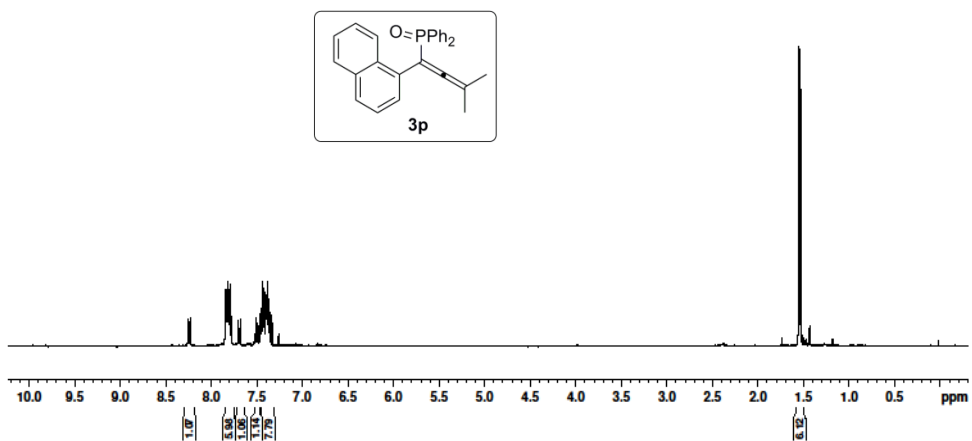

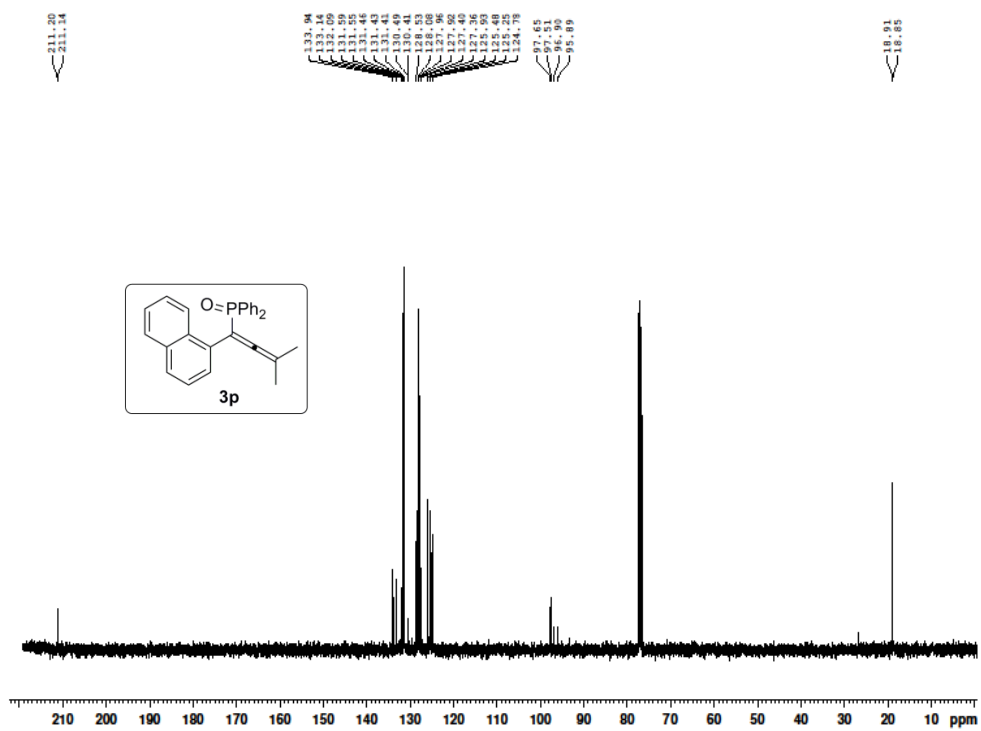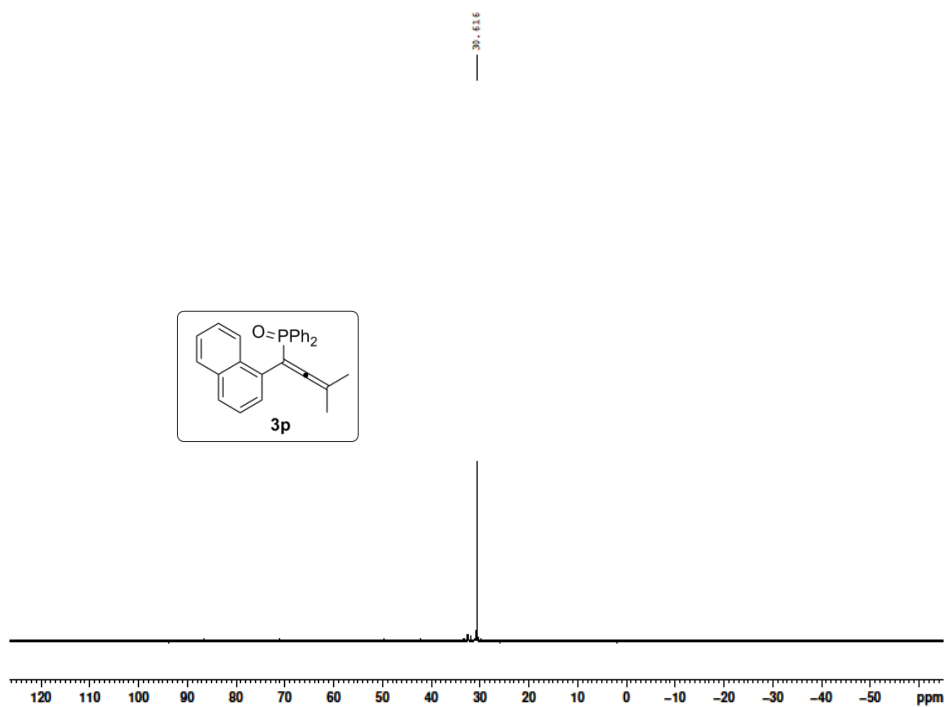

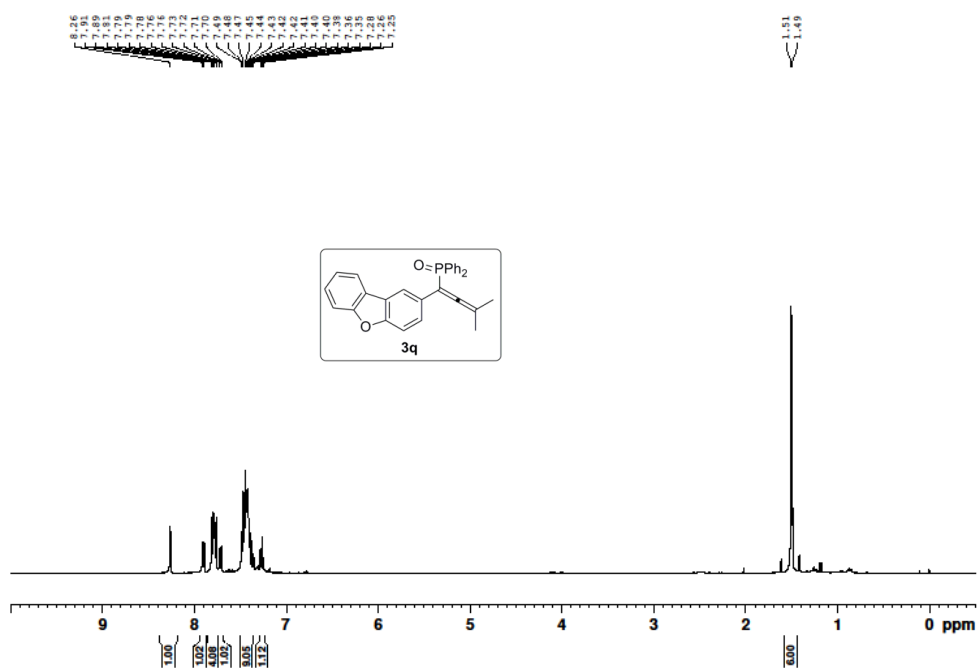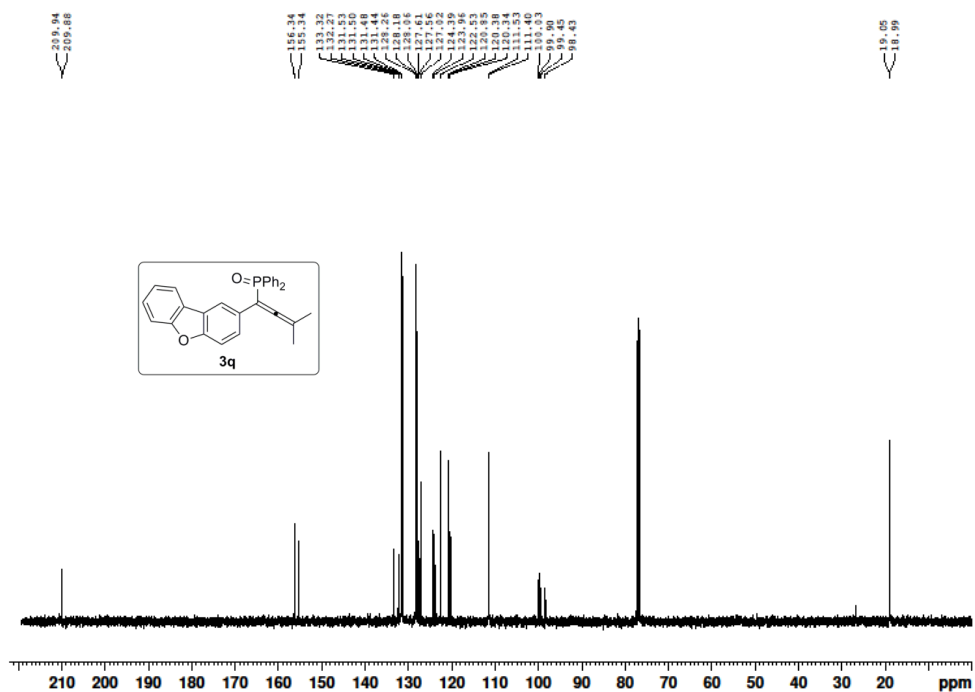

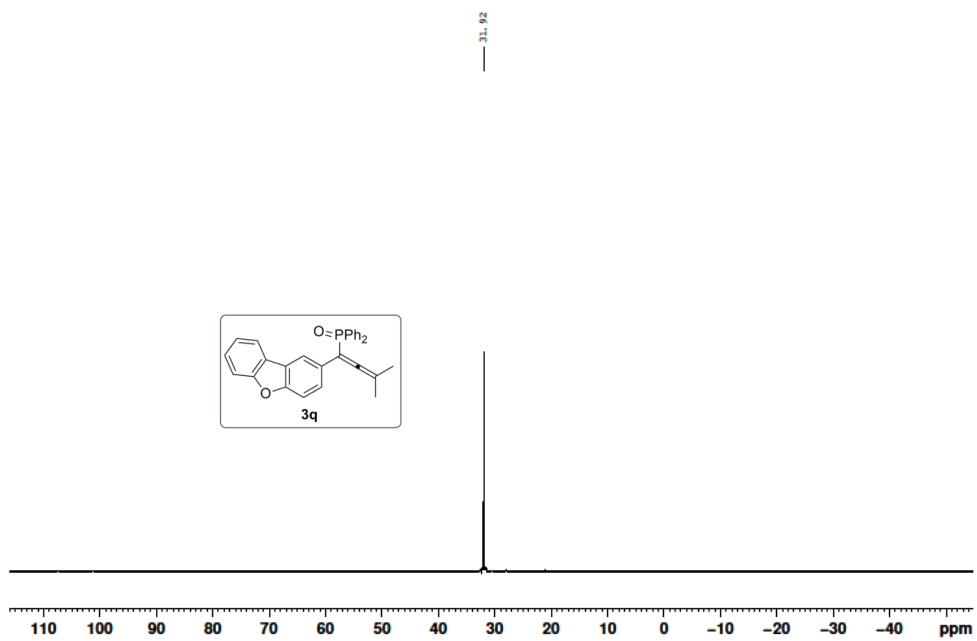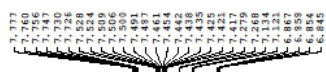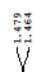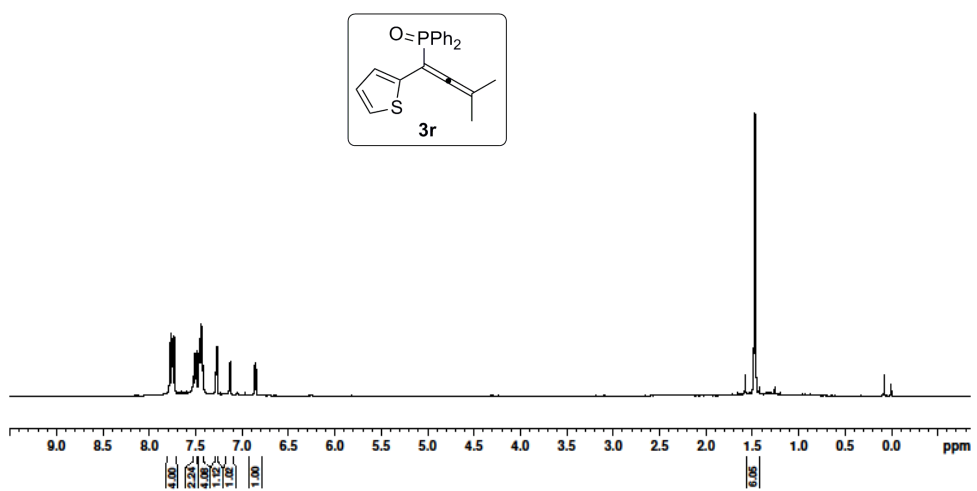



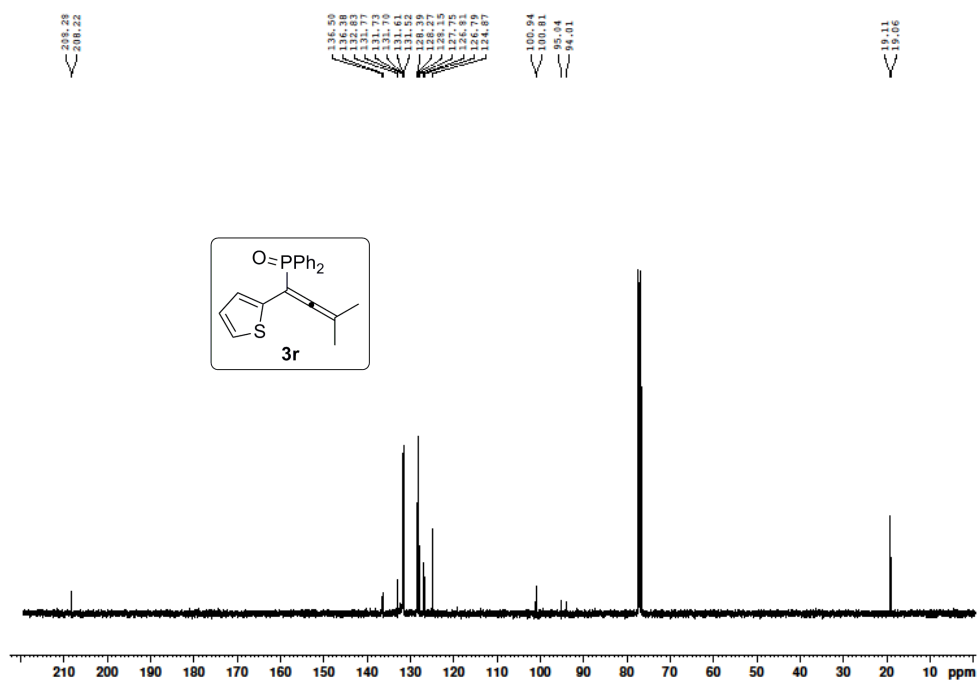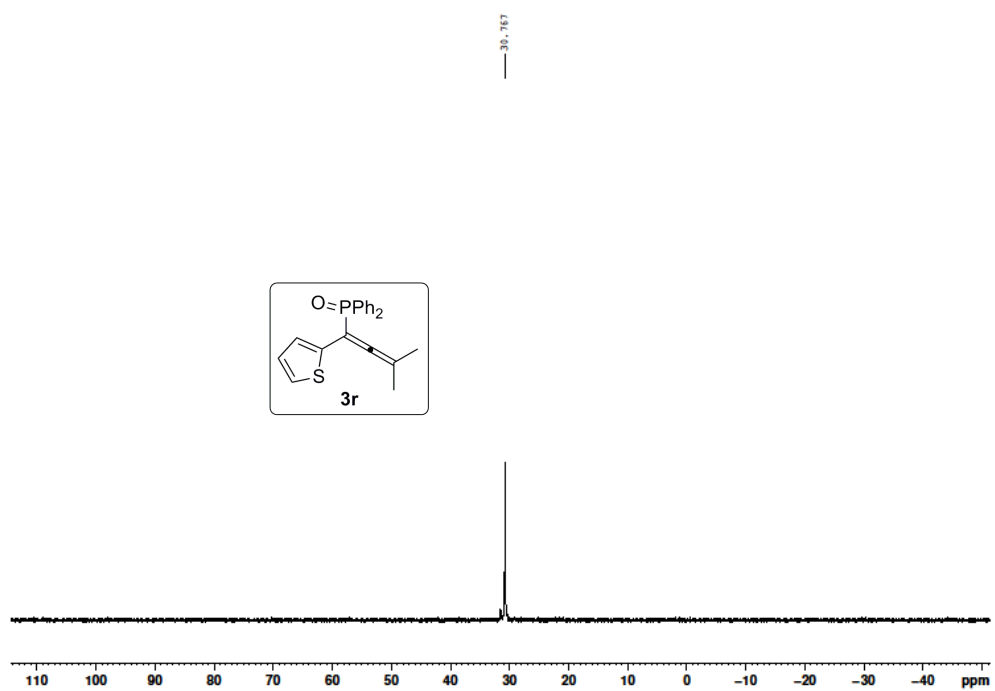

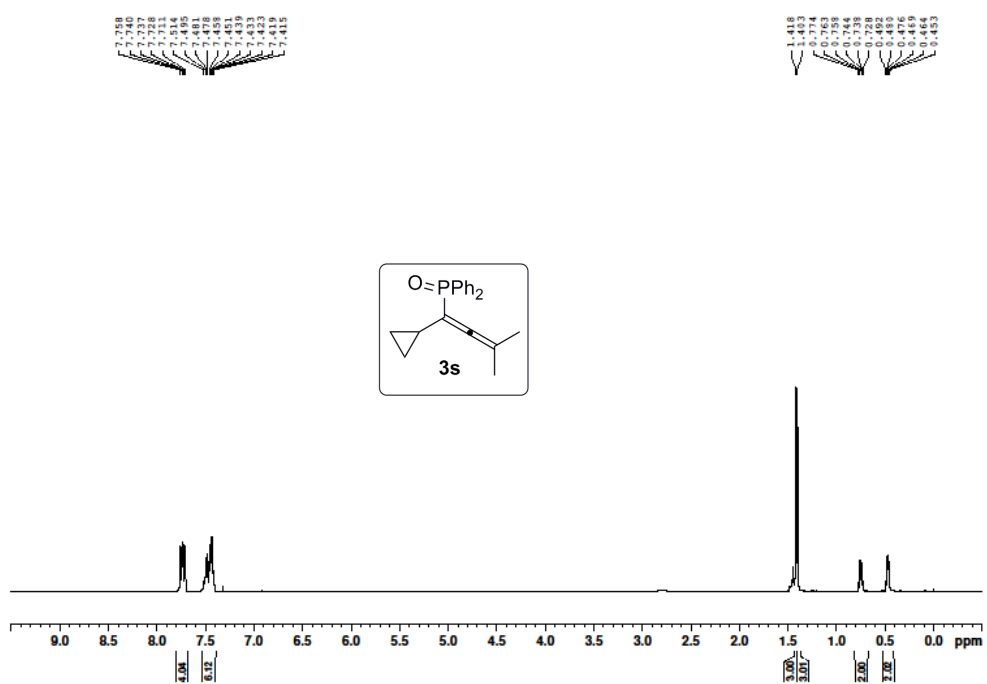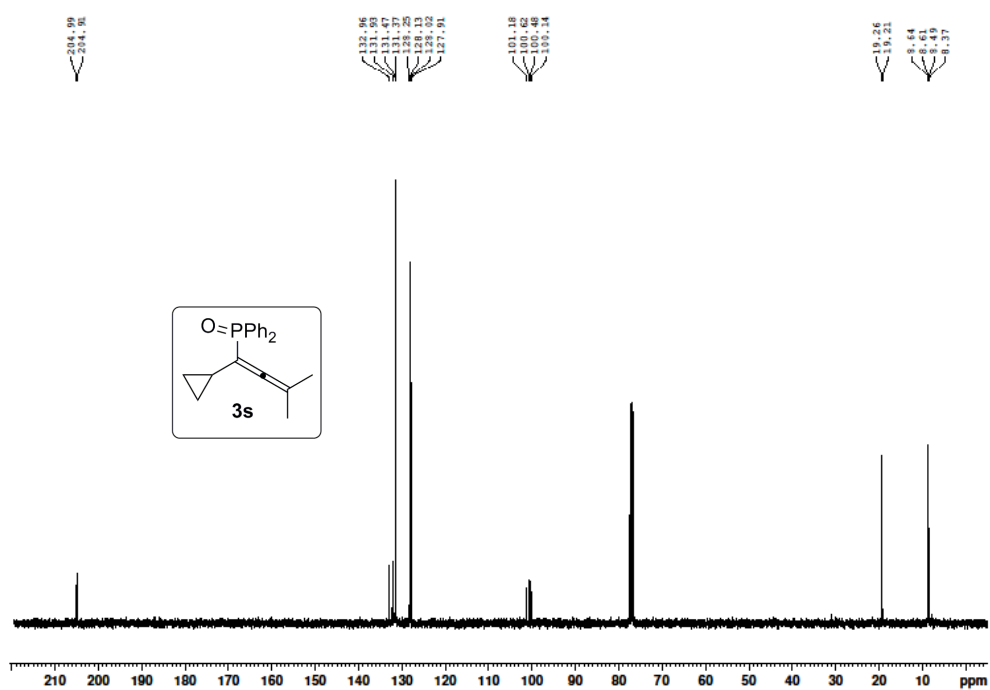

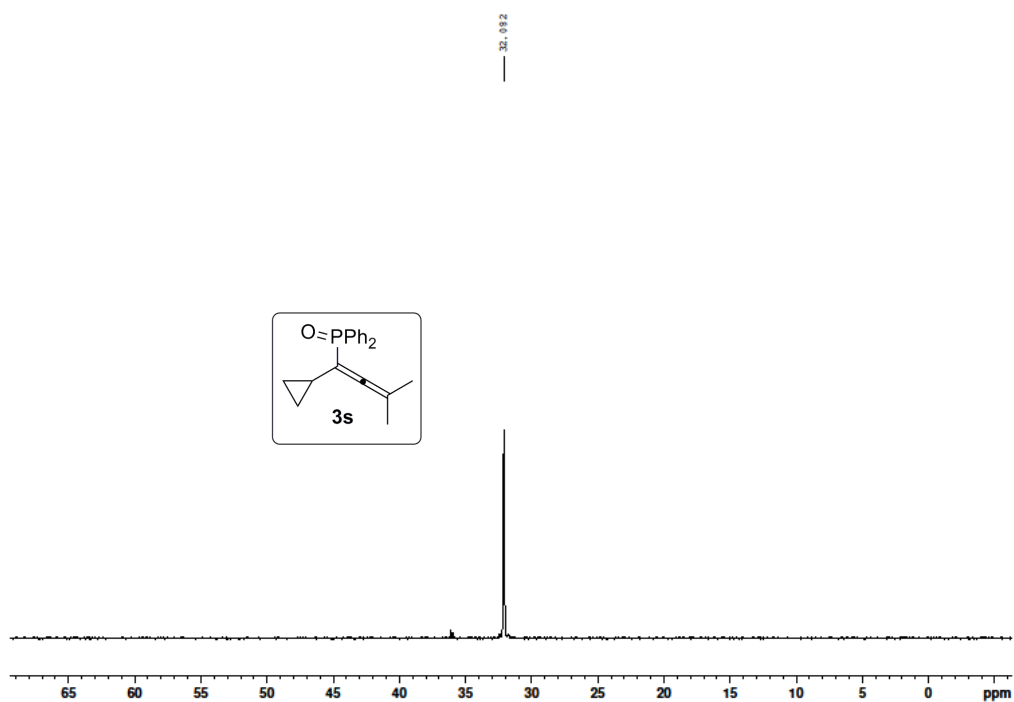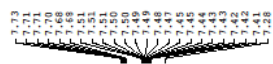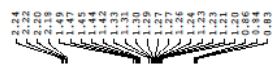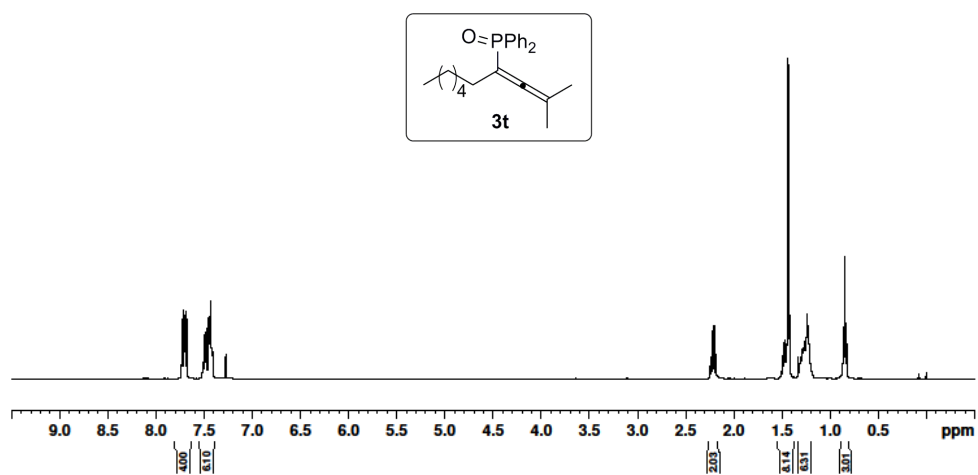

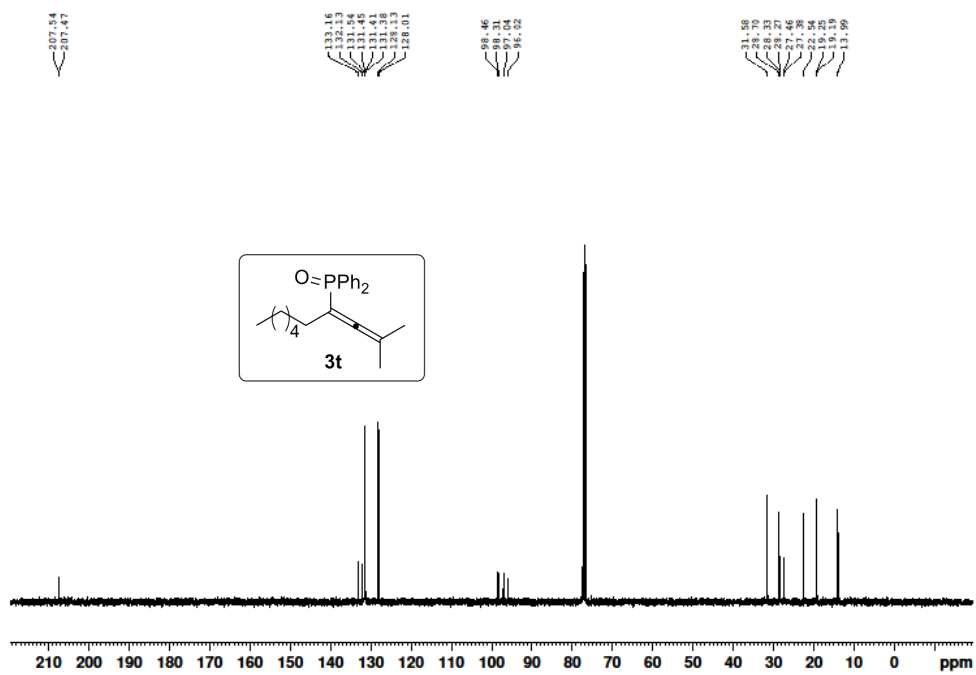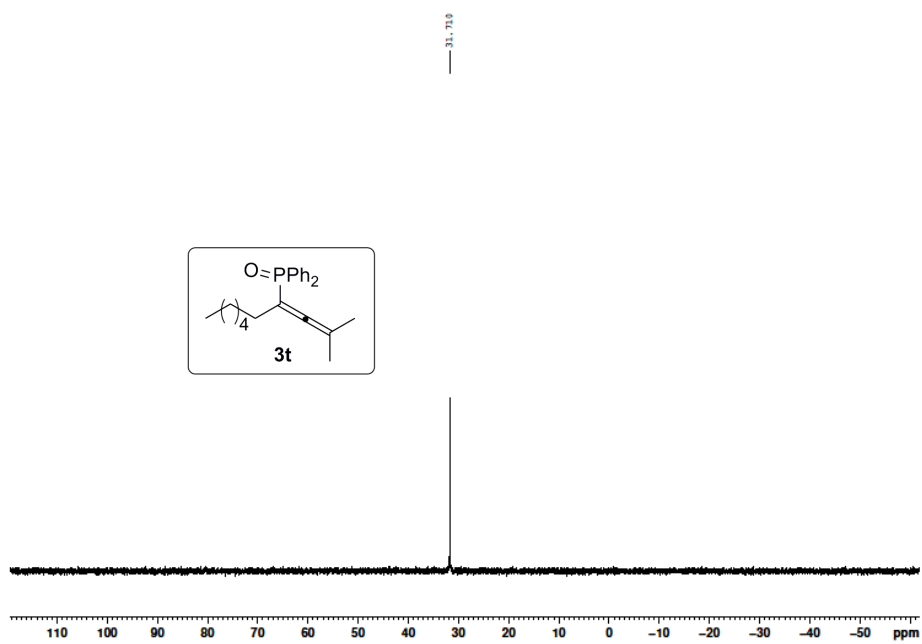

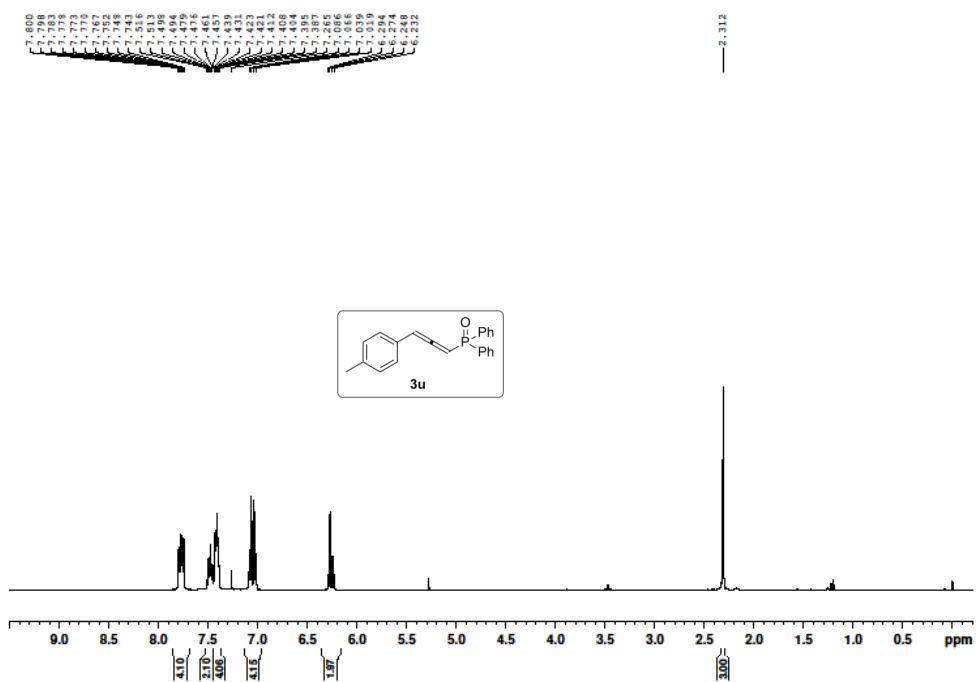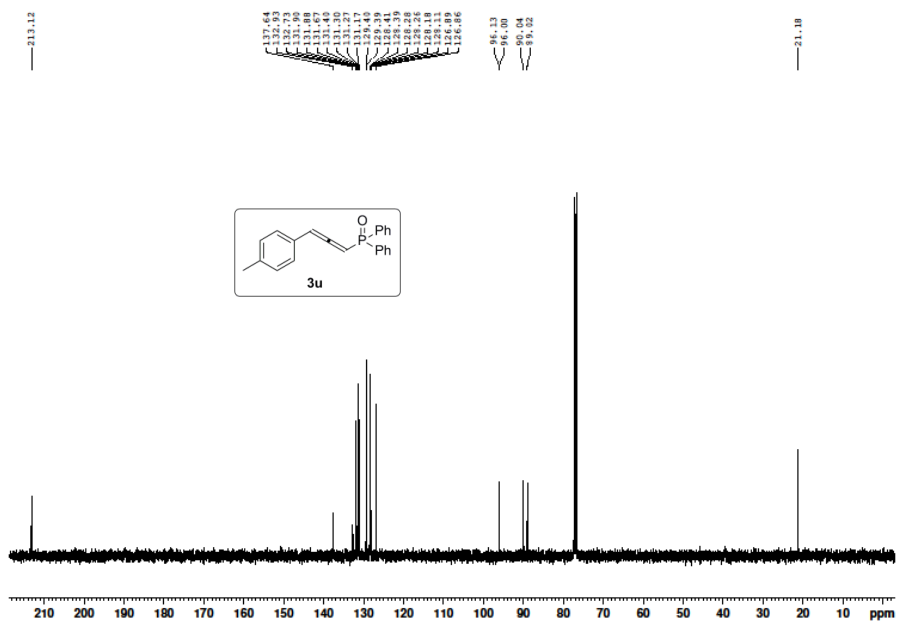

—23.921

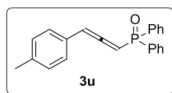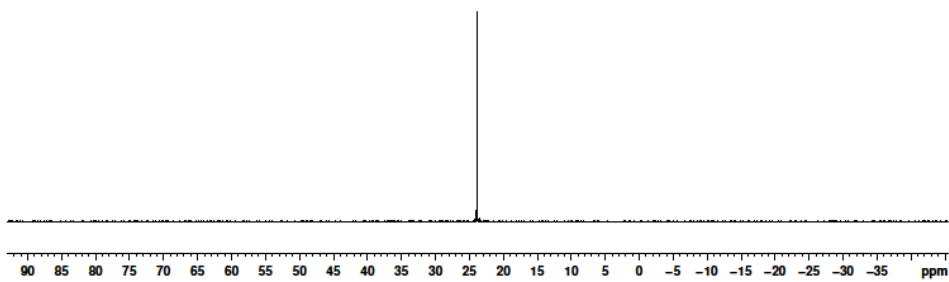

7.670  
7.665  
7.663  
7.648  
7.642  
7.637  
7.634  
7.630  
7.593  
7.573  
7.270  
7.251  
7.231  
7.213  
7.170  
7.152  
7.146  
7.133  
6.980  
6.934  
6.918  
6.912

3.817

1.510  
1.495

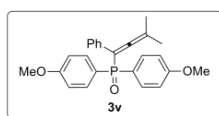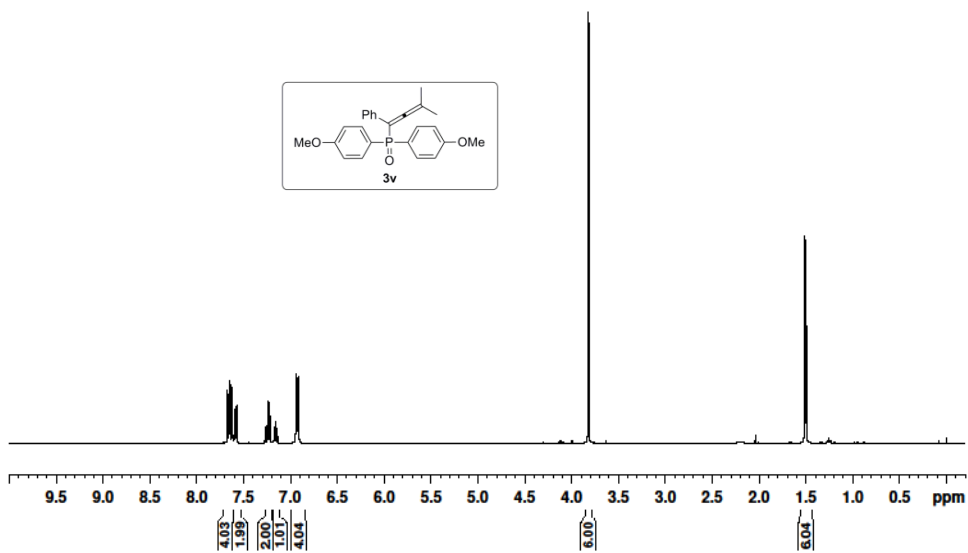

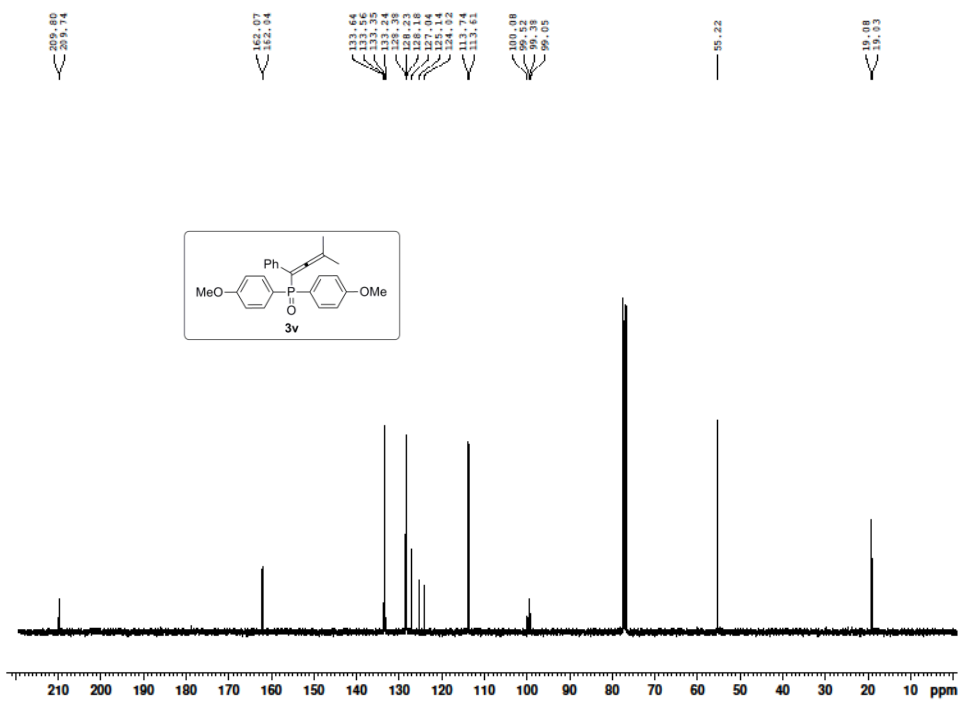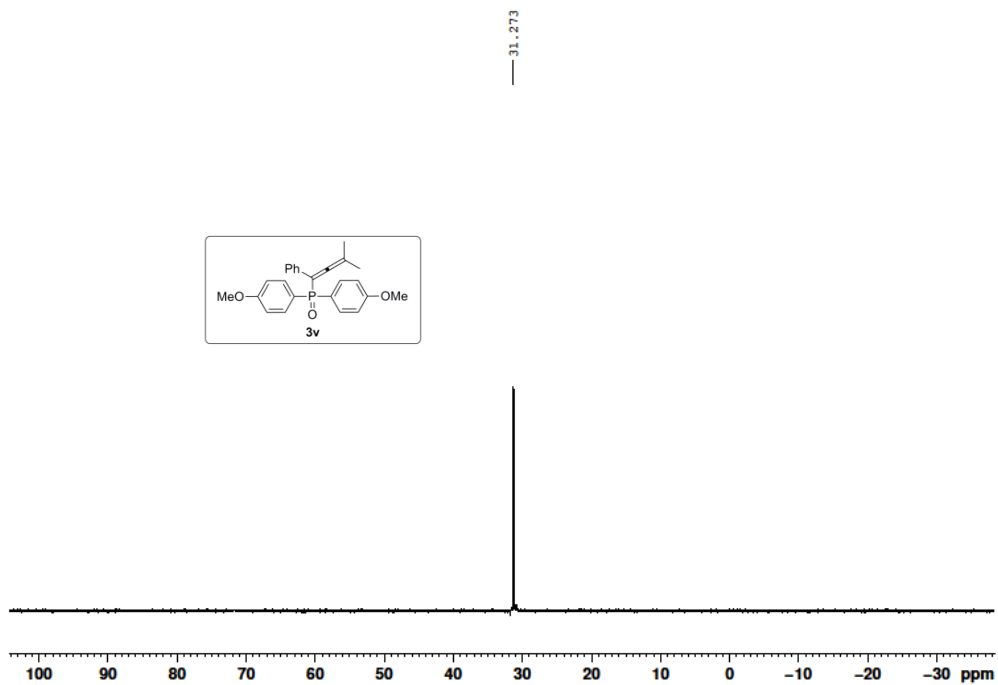

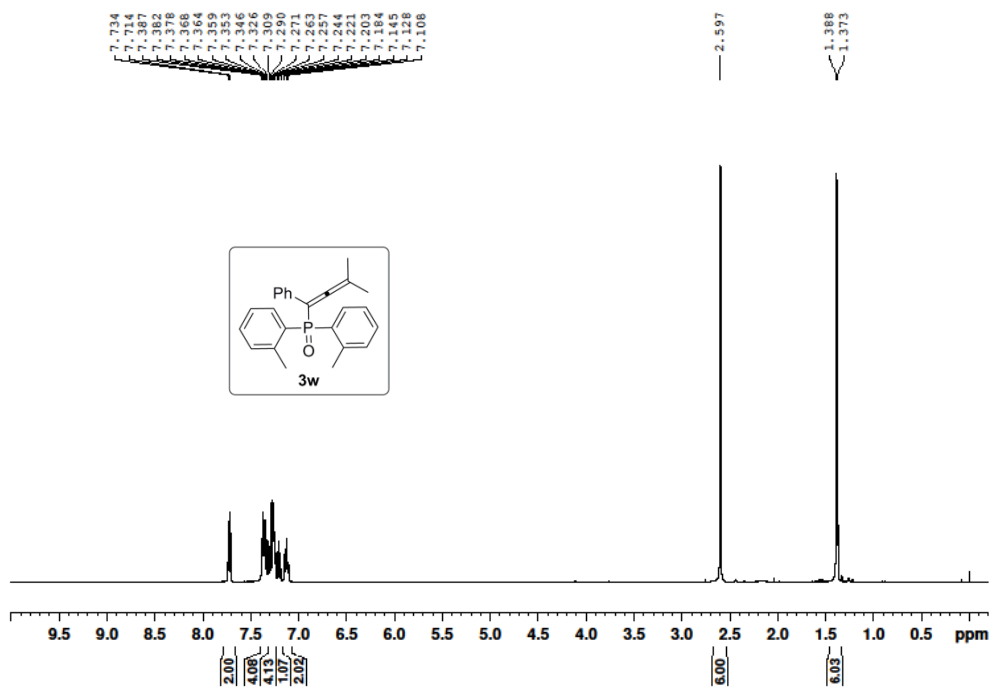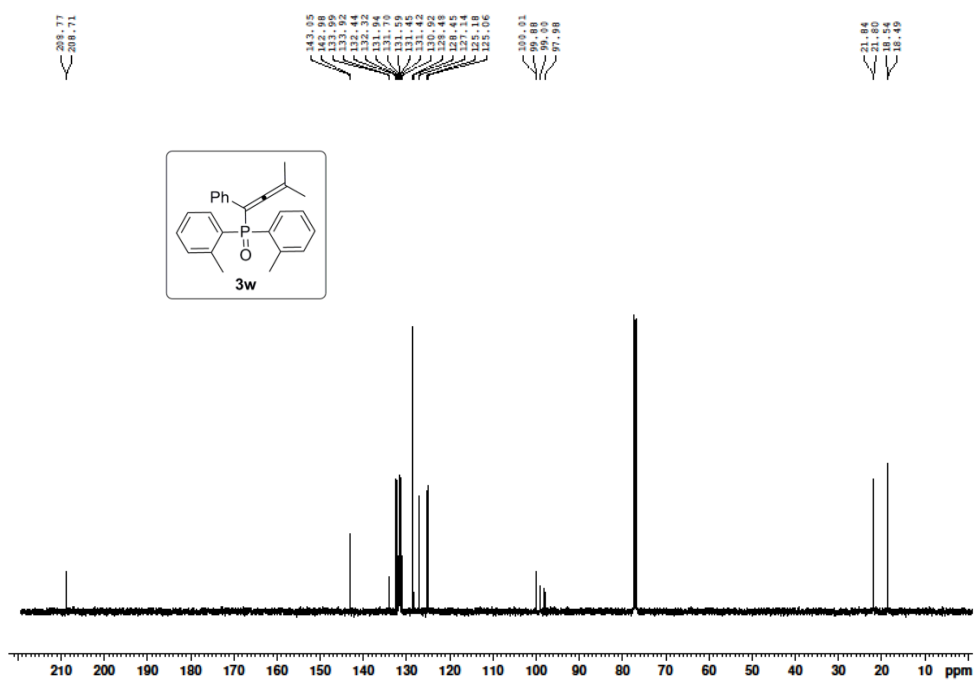



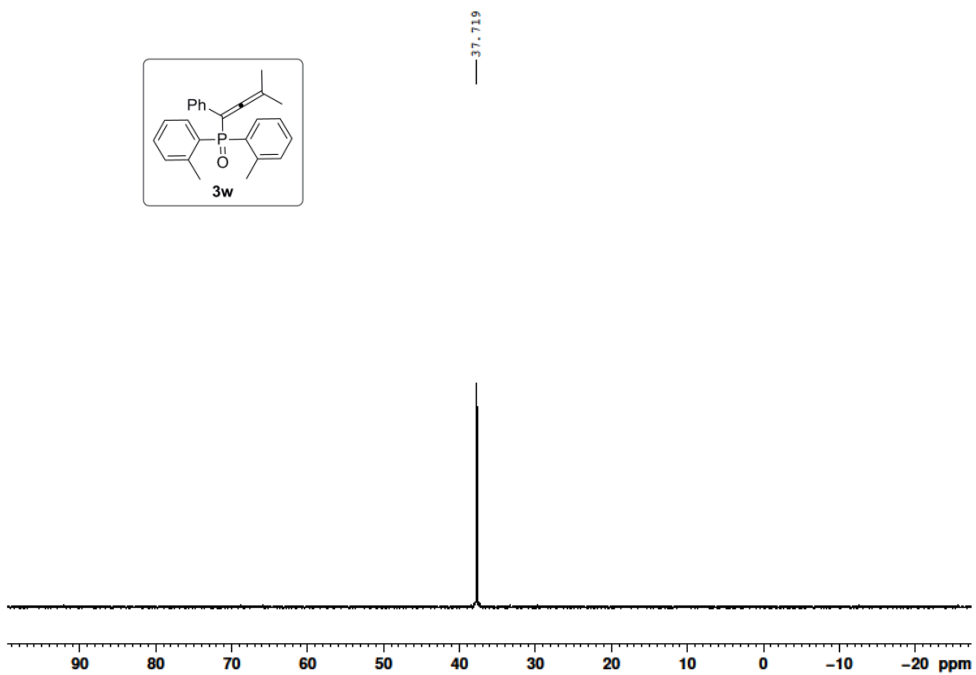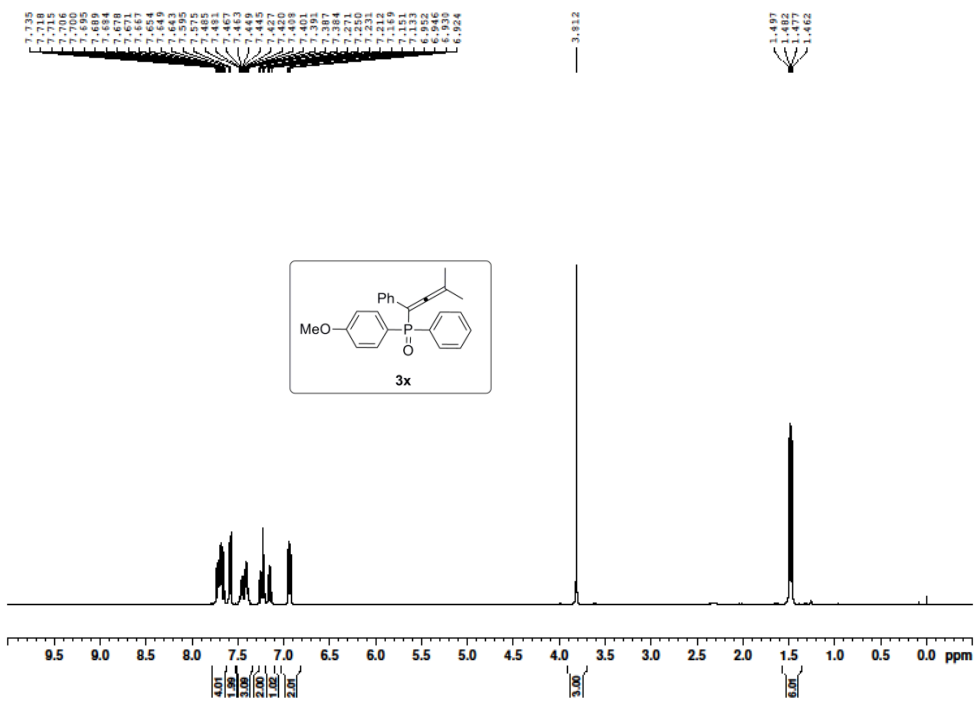

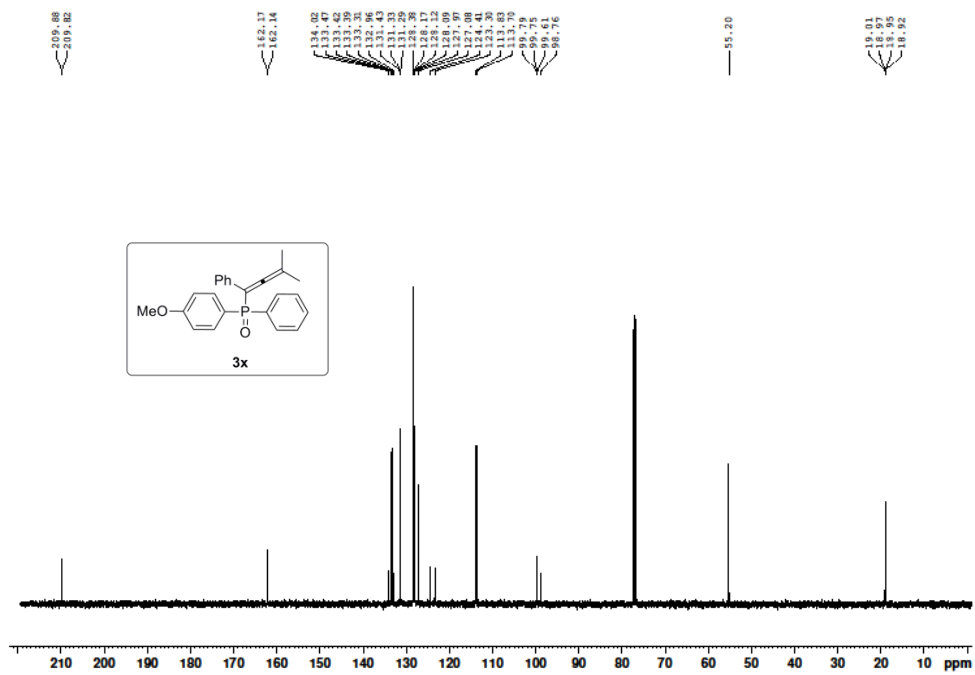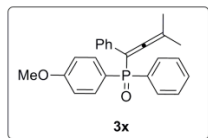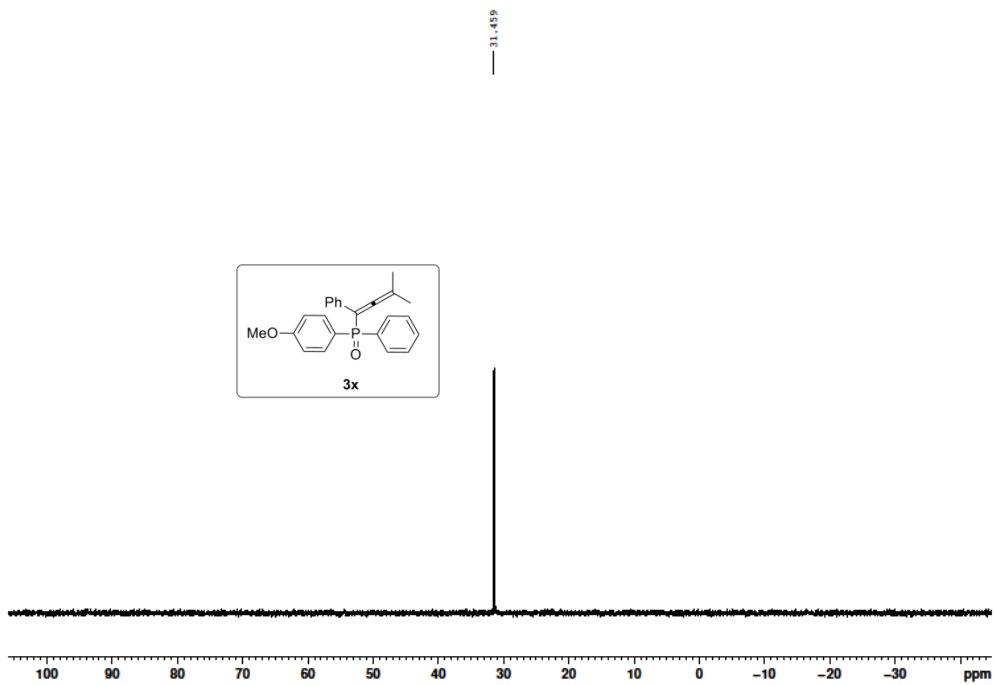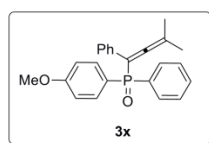



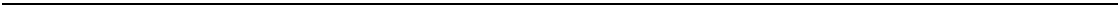

— 32.273

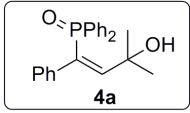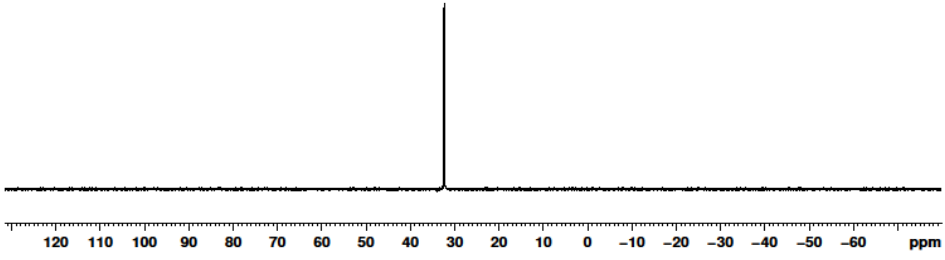

Supplement: c6qo00767h1.pdf [file c6qo00767h1.pdf]
